# Supplementary material
Source: bioRxiv or medRxiv preprint supplement (https://medrxiv.org/highwire/filestream/74063/field_highwire_adjunct_files/0/2020.03.16.20036590-1.pdf)
Supplement: Supplementary file [file 2020.03.16.20036590-1.pdf]

|    | <b>Preprint Title</b>                                                                                                                                                                 | <b>Database</b> | <b>Type of Preprint</b>        | <b>Upload date</b> |
|----|---------------------------------------------------------------------------------------------------------------------------------------------------------------------------------------|-----------------|--------------------------------|--------------------|
| 1  | Water and the biology of prions and plaques                                                                                                                                           | BioRxiv         | Basic Science or Translational | 2013-11-12         |
| 2  | Extensive Decoupling of Metabolic Genes in Cancer                                                                                                                                     | BioRxiv         | Basic Science or Translational | 2014-09-09         |
| 3  | Characterization of the transcriptome, nucleotide sequence polymorphism, and natural selection in the desert adapted mouse <i>Peromyscus eremicus</i>                                 | BioRxiv         | Basic Science or Translational | 2014-09-29         |
| 4  | Integrative Genome-wide Analysis of the Determinants of RNA Splicing in Kidney Renal Clear Cell Carcinoma                                                                             | BioRxiv         | Basic Science or Translational | 2014-10-19         |
| 5  | Mitochondrial DNA Copy Number Variation Across Human Cancers                                                                                                                          | BioRxiv         | Basic Science or Translational | 2015-06-27         |
| 6  | Inverting proteomics analysis provides powerful insight into the peptide/protein conundrum                                                                                            | BioRxiv         | Basic Science or Translational | 2015-07-31         |
| 7  | Fuzzy-FishNet: A highly precise distribution-free network approach for feature selection in clinical proteomics                                                                       | BioRxiv         | Basic Science or Translational | 2015-08-12         |
| 8  | Pathological Oxidation of PTPN12 Underlies ABL1 Phosphorylation in HLRCC                                                                                                              | BioRxiv         | Basic Science or Translational | 2015-09-01         |
| 9  | Exome Sequencing and Prediction of Long-Term Kidney Allograft Function                                                                                                                | BioRxiv         | Basic Science or Translational | 2015-09-27         |
| 10 | An Empirical Biomarker-based Calculator for Autosomal Recessive Polycystic Kidney Disease The Nieto-Narayan Formula                                                                   | BioRxiv         | Basic Science or Translational | 2016-01-26         |
| 11 | The viral polymerase inhibitor 7-deaza-2'-C-methyladenosine is a potent inhibitor of in vitro Zika virus replication and delays disease progression in a robust mouse infection model | BioRxiv         | Basic Science or Translational | 2016-03-01         |
| 12 | Recognizing the Continuous Nature of Expression Heterogeneity and Clinical Outcomes in Clear Cell Renal Cell Carcinoma                                                                | BioRxiv         | Basic Science or Translational | 2016-03-25         |
| 13 | An in situ atlas of mitochondrial DNA in mammalian tissues reveals high content in stem/progenitor cells                                                                              | BioRxiv         | Basic Science or Translational | 2016-04-23         |
| 14 | Pan-cancer analysis of the metabolic reaction network                                                                                                                                 | BioRxiv         | Basic Science or Translational | 2016-05-17         |
| 15 | Networks that Link Cytoskeletal Regulators and Diaphragm Proteins Underpin Filtration Function in <i>Drosophila</i> Nephrocytes                                                       | BioRxiv         | Basic Science or Translational | 2016-06-14         |
| 16 | Chaotic propagation of spatial cytoskeletal instability modulates integrity of podocyte foot processes                                                                                | BioRxiv         | Basic Science or Translational | 2016-07-26         |
| 17 | phyC: Clustering cancer evolutionary trees                                                                                                                                            | BioRxiv         | Basic Science or Translational | 2016-08-12         |
| 18 | Evaluating Mendelian nephrotic syndrome genes for evidence of risk alleles or oligogenicity that explain heritability                                                                 | BioRxiv         | Basic Science or Translational | 2016-08-25         |
| 19 | microRNA-mRNA interaction identification in Wilms tumor using principal component analysis based unsupervised feature extraction                                                      | BioRxiv         | Basic Science or Translational | 2016-08-30         |
| 20 | Quantifying the extent to which index event biases influence large genetic association studies                                                                                        | BioRxiv         | Basic Science or Translational | 2016-09-12         |
| 21 | Hand2 Inhibits Kidney Specification While Promoting Vein Formation Within the Posterior Mesoderm                                                                                      | BioRxiv         | Basic Science or Translational | 2016-09-13         |
| 22 | Microevolution of bank voles ( <i>Myodes glareolus</i> ) at neutral and immune-related genes during multiannual dynamic cycles: Consequences for Puumala hantavirus epidemiology      | BioRxiv         | Basic Science or Translational | 2016-09-16         |
| 23 | GWAS for serum galactose-deficient IgA1 implicates critical genes of the O-glycosylation pathway                                                                                      | BioRxiv         | Basic Science or Translational | 2016-09-21         |
| 24 | The conversion of systolic volume into systolic pressure (the development of numerical model)                                                                                         | BioRxiv         | Basic Science or Translational | 2016-10-05         |
| 25 | Genome sequencing and analysis of the first spontaneous Nanosilver resistant bacterium <i>Proteus mirabilis</i> strain SCDR1                                                          | BioRxiv         | Basic Science or Translational | 2016-11-27         |

|    |                                                                                                                                                                                                |         |                                |            |
|----|------------------------------------------------------------------------------------------------------------------------------------------------------------------------------------------------|---------|--------------------------------|------------|
| 26 | VHL inactivation without hypoxia is sufficient to achieve genome hypermethylation                                                                                                              | BioRxiv | Basic Science or Translational | 2016-12-12 |
| 27 | Mechanical activation of epithelial Na <sup>+</sup> channel relies on an interdependent activity of the extracellular matrix and extracellular N-glycans of $\alpha$ ENaC                      | BioRxiv | Basic Science or Translational | 2017-01-25 |
| 28 | Severe acute dehydration in a desert rodent elicits a transcriptional response that effectively prevents kidney injury                                                                         | BioRxiv | Basic Science or Translational | 2017-01-25 |
| 29 | Translational contributions to tissue-specificity in rhythmic and constitutive gene expression                                                                                                 | BioRxiv | Basic Science or Translational | 2017-02-07 |
| 30 | Physiological and biochemical changes associated with acute experimental dehydration in the desert adapted mouse, <i>Peromyscus eremicus</i>                                                   | BioRxiv | Basic Science or Translational | 2017-02-13 |
| 31 | Treatment of Graft-versus-Host Disease by Echinomycin in a New Humanized Mouse Model                                                                                                           | BioRxiv | Basic Science or Translational | 2017-02-16 |
| 32 | Novel blood pressure locus and gene discovery using GWAS and expression datasets from blood and the kidney                                                                                     | BioRxiv | Basic Science or Translational | 2017-02-22 |
| 33 | High fidelity hypothermic preservation of primary tissues in organ transplant preservative for single cell transcriptome analysis                                                              | BioRxiv | Basic Science or Translational | 2017-03-01 |
| 34 | CiliaCarta: an integrated and validated compendium of ciliary genes                                                                                                                            | BioRxiv | Basic Science or Translational | 2017-04-03 |
| 35 | High-resolution analysis of spatiotemporal virulence gene regulation during food-borne infection with <i>Escherichia coli</i> O157:H7 within a live host                                       | BioRxiv | Basic Science or Translational | 2017-04-20 |
| 36 | Sofosbuvir protects Zika virus-infected mice from mortality, preventing short- and long-term sequela                                                                                           | BioRxiv | Basic Science or Translational | 2017-04-20 |
| 37 | The closed-loop pathways of signaling molecules                                                                                                                                                | BioRxiv | Basic Science or Translational | 2017-04-23 |
| 38 | <i>Enterococcus faecalis</i> promotes innate immune suppression and polymicrobial catheter-associated urinary tract infection                                                                  | BioRxiv | Basic Science or Translational | 2017-05-11 |
| 39 | Parametric Imaging of FDG-PET Data Using Physiology and Iterative Regularization: Application to the Hepatic and Renal Systems                                                                 | BioRxiv | Basic Science or Translational | 2017-05-11 |
| 40 | APAP-induced organ toxicity in rats: The prophylactic role of <i>Acrocarpus fraxinifolius</i>                                                                                                  | BioRxiv | Basic Science or Translational | 2017-05-27 |
| 41 | Murine glomerular transcriptome links endothelial cell-specific molecule-1 deficiency with susceptibility to diabetic nephropathy                                                              | BioRxiv | Basic Science or Translational | 2017-05-27 |
| 42 | The genetic overlap between mood disorders and cardio-metabolic diseases: A systematic review of genome wide and candidate gene studies                                                        | BioRxiv | Basic Science or Translational | 2017-06-15 |
| 43 | Detecting repeated cancer evolution in human tumours from multi-region sequencing data                                                                                                         | BioRxiv | Basic Science or Translational | 2017-06-27 |
| 44 | Translational and HIF1 $\alpha$ -dependent metabolic reprogramming underpin oncometabolome plasticity and synergy between oncogenic kinase inhibitors and biguanides                           | BioRxiv | Basic Science or Translational | 2017-07-08 |
| 45 | Comprehensive Molecular Characterization of Mitochondrial Genomes in Human Cancers                                                                                                             | BioRxiv | Basic Science or Translational | 2017-07-09 |
| 46 | Bayesian inference of agent-based models: a tool for studying kidney branching morphogenesis                                                                                                   | BioRxiv | Basic Science or Translational | 2017-07-12 |
| 47 | Histopathological Effects of Therapeutic Doses of Combined XO-Inhibitors and ACE-Inhibitors on the Expression of VEGF-A in the Myocardium and Renal Cortex in Chronic Hypertensive Albino Rats | BioRxiv | Basic Science or Translational | 2017-07-15 |
| 48 | The Cryo-Electron Microscopy Structure of the Type 1 Chaperone-Usher Pilus Rod                                                                                                                 | BioRxiv | Basic Science or Translational | 2017-07-17 |
| 49 | Modest static pressure suppresses columnar epithelial cell proliferation in association with cell shape and cytoskeletal modifications                                                         | BioRxiv | Basic Science or Translational | 2017-07-22 |
| 50 | Identification of Rab18 as an Essential Host Factor for BKPyV Infection Using a Whole Genome RNA Interference Screen                                                                           | BioRxiv | Basic Science or Translational | 2017-08-23 |
| 51 | Discovering genetic interactions bridging pathways in genome-wide association studies                                                                                                          | BioRxiv | Basic Science or Translational | 2017-08-30 |

|    |                                                                                                                                                                                |         |                                |            |
|----|--------------------------------------------------------------------------------------------------------------------------------------------------------------------------------|---------|--------------------------------|------------|
| 52 | GLP-1 receptor agonist ameliorates obesity-induced chronic kidney injury via restoring renal lipid and energy metabolism homeostasis: revealed by metabolomics                 | BioRxiv | Basic Science or Translational | 2017-09-27 |
| 53 | Individual nephron proteomes connect morphology and function in proteinuric kidney disease                                                                                     | BioRxiv | Basic Science or Translational | 2017-09-27 |
| 54 | Gestational low-protein intake enhances the whole kidney miR-192 and miR-200 family expression and epithelial-to-mesenchymal transition in adult male offspring                | BioRxiv | Basic Science or Translational | 2017-10-05 |
| 55 | Introduction of single nucleotide variations into the promoter region of the mouse kidney anion exchanger 1 gene downstream of a TATA box changes its transcriptional activity | BioRxiv | Basic Science or Translational | 2017-10-06 |
| 56 | Genetic analysis of over one million people identifies 535 novel loci for blood pressure                                                                                       | BioRxiv | Basic Science or Translational | 2017-10-11 |
| 57 | Comprehensive single cell RNAseq analysis of the kidney reveals novel cell types and unexpected cell plasticity                                                                | BioRxiv | Basic Science or Translational | 2017-10-13 |
| 58 | Non-invasive detection of upper tract urothelial carcinomas through the analysis of driver gene mutations and aneuploidy in urine                                              | BioRxiv | Basic Science or Translational | 2017-10-16 |
| 59 | Transcription factor activity rhythms and tissue-specific chromatin interactions explain circadian gene expression across organs                                               | BioRxiv | Basic Science or Translational | 2017-10-23 |
| 60 | Shavenbaby and Yorkie mediate Hippo signaling to protect adult stem cells from apoptosis                                                                                       | BioRxiv | Basic Science or Translational | 2017-10-26 |
| 61 | PKD2 is an essential ion channel subunit in the primary cilium of the renal collecting duct epithelium                                                                         | BioRxiv | Basic Science or Translational | 2017-11-07 |
| 62 | BayCount: A Bayesian Decomposition Method for Inferring Tumor Heterogeneity using RNA-Seq Counts                                                                               | BioRxiv | Basic Science or Translational | 2017-11-13 |
| 63 | Propofol induces a metabolic switch to glycolysis and cell death in a mitochondrial electron transport chain-dependent manner                                                  | BioRxiv | Basic Science or Translational | 2017-11-16 |
| 64 | A urine-dependent human urothelial organoid offers a promising alternative to rodent models of infection                                                                       | BioRxiv | Basic Science or Translational | 2017-11-24 |
| 65 | Functional Plasticity of the gut and the Malpighian tubules underlies cold acclimation and mitigates cold-induced hyperkalemia in <i>Drosophila melanogaster</i>               | BioRxiv | Basic Science or Translational | 2017-11-24 |
| 66 | Deferiprone, an Iron Chelator, is Preventive and Therapeutic in Experimental Crescentic Glomerulonephritis                                                                     | BioRxiv | Basic Science or Translational | 2017-11-27 |
| 67 | Whole genome and RNA sequencing of 1,220 cancers reveals hundreds of genes deregulated by rearrangement of cis-regulatory elements                                             | BioRxiv | Basic Science or Translational | 2017-11-28 |
| 68 | Distinct chromatin signatures of DNA hypomethylation in aging and cancer                                                                                                       | BioRxiv | Basic Science or Translational | 2017-12-05 |
| 69 | Comparative analysis of kidney organoid and adult human kidney single cell and single nucleus transcriptomes                                                                   | BioRxiv | Basic Science or Translational | 2017-12-11 |
| 70 | Highly tamoxifen-inducible principal-cell-specific Cre mice with complete fidelity in cell specificity and no leakiness                                                        | BioRxiv | Basic Science or Translational | 2017-12-11 |
| 71 | Ultraconserved elements occupy specific arenas of three-dimensional mammalian genome organization                                                                              | BioRxiv | Basic Science or Translational | 2017-12-16 |
| 72 | Ex vivo live cell tracking in kidney organoids using light sheet fluorescence microscopy                                                                                       | BioRxiv | Basic Science or Translational | 2017-12-18 |
| 73 | A simple bioreactor-based method to generate kidney organoids from pluripotent stem cells                                                                                      | BioRxiv | Basic Science or Translational | 2017-12-20 |
| 74 | Proteomic and biochemical comparison of the cellular interaction partners of human VPS33A and VPS33B                                                                           | BioRxiv | Basic Science or Translational | 2017-12-20 |
| 75 | Comprehensive Cell Type Specific Transcriptomics of the Human Kidney                                                                                                           | BioRxiv | Basic Science or Translational | 2017-12-22 |
| 76 | High throughput single cell RNA-seq of developing mouse kidney and human kidney organoids reveals a roadmap for recreating the kidney                                          | BioRxiv | Basic Science or Translational | 2017-12-22 |
| 77 | Transcriptional evaluation of the developmental accuracy, reproducibility and robustness of kidney organoids derived from human pluripotent stem cells                         | BioRxiv | Basic Science or Translational | 2017-12-22 |

|     |                                                                                                                                                                                                          |         |                                |            |
|-----|----------------------------------------------------------------------------------------------------------------------------------------------------------------------------------------------------------|---------|--------------------------------|------------|
| 78  | Comparing the differentiation potential of Brachyury+ mesodermal cells generated from 3-D and 2-D culture systems                                                                                        | BioRxiv | Basic Science or Translational | 2017-12-26 |
| 79  | Discordant association of the CREBRF rs373863828 minor allele with increased body mass index and protection from type 2 diabetes in Māori and Pacific (Polynesian) people living in Aotearoa New Zealand | BioRxiv | Basic Science or Translational | 2018-01-02 |
| 80  | Targeting the DNM3OS / miR-199a~214 cluster for the treatment of fibroproliferative diseases                                                                                                             | BioRxiv | Basic Science or Translational | 2018-01-04 |
| 81  | Structure and diversity of urinary cell-free DNA informative of host-pathogen interactions in human urinary tract infection                                                                              | BioRxiv | Basic Science or Translational | 2018-01-16 |
| 82  | Genomic risk prediction of coronary artery disease in nearly 500,000 adults: implications for early screening and primary prevention                                                                     | BioRxiv | Basic Science or Translational | 2018-01-19 |
| 83  | Inhibition of CaOx crystals by Neolamarckia cadamba: An in vivo approach                                                                                                                                 | BioRxiv | Basic Science or Translational | 2018-01-25 |
| 84  | Single-cell analysis of progenitor cell dynamics and lineage specification of the human fetal kidney                                                                                                     | BioRxiv | Basic Science or Translational | 2018-02-01 |
| 85  | Evolution of human, chicken, alligator, frog and zebrafish mineralocorticoid receptors: Allosteric influence on steroid specificity                                                                      | BioRxiv | Basic Science or Translational | 2018-02-02 |
| 86  | A protocol for single-cell transcriptomics from cryopreserved renal tissue and urine for the Accelerating Medicine Partnership (AMP) RA/SLE network                                                      | BioRxiv | Basic Science or Translational | 2018-03-05 |
| 87  | Kynurenine 3-monooxygenase (KMO) is a critical regulator of renal ischemia-reperfusion injury                                                                                                            | BioRxiv | Basic Science or Translational | 2018-03-07 |
| 88  | Organ-specific translation elongation rates measured by in vivo ribosome profiling                                                                                                                       | BioRxiv | Basic Science or Translational | 2018-03-08 |
| 89  | The TRPC6-AMPK pathway is involved in cytoskeleton reorganization and glucose uptake in podocytes                                                                                                        | BioRxiv | Basic Science or Translational | 2018-03-08 |
| 90  | An eQTL landscape of kidney tissue in human nephrotic syndrome                                                                                                                                           | BioRxiv | Basic Science or Translational | 2018-03-16 |
| 91  | CCA based multi-view feature selection for multi-omics data integration                                                                                                                                  | BioRxiv | Basic Science or Translational | 2018-03-16 |
| 92  | A chemoproteomic portrait of the oncometabolite fumarate                                                                                                                                                 | BioRxiv | Basic Science or Translational | 2018-03-22 |
| 93  | Cryo-EM structure of the polycystin 2-l1 ion channel                                                                                                                                                     | BioRxiv | Basic Science or Translational | 2018-03-22 |
| 94  | Preclinical Study: Sunitinib-suppressed MiR-452-5p Facilitates Renal Cancer Cell Invasion and Metastasis Through Modulating SMAD4/SMAD7/EMT Signals                                                      | BioRxiv | Basic Science or Translational | 2018-03-22 |
| 95  | Cyclophilins A and B Oppositely Regulate Renal Tubular Epithelial Phenotype                                                                                                                              | BioRxiv | Basic Science or Translational | 2018-03-26 |
| 96  | Cystinosin regulates kidney inflammation through its interaction with galectin-3                                                                                                                         | BioRxiv | Basic Science or Translational | 2018-03-27 |
| 97  | Small non-coding RNA expression in developing mouse nephron progenitor cells                                                                                                                             | BioRxiv | Basic Science or Translational | 2018-03-27 |
| 98  | Jagged1/Notch2 Controls Kidney Fibrosis via Tfam-mediated Metabolic Reprogramming                                                                                                                        | BioRxiv | Basic Science or Translational | 2018-03-29 |
| 99  | Sex-specific and pleiotropic effects underlying kidney function identified from GWAS meta-analysis                                                                                                       | BioRxiv | Basic Science or Translational | 2018-03-31 |
| 100 | Predicting humoral alloimmunity from differences in donor-recipient HLA surface electrostatic potential                                                                                                  | BioRxiv | Basic Science or Translational | 2018-04-04 |
| 101 | Tissue Tropism and Transmission Ecology Predict Virulence of Human RNA Viruses                                                                                                                           | BioRxiv | Basic Science or Translational | 2018-04-06 |
| 102 | STF-62247 blocks late stages of autophagy by disrupting lysosomal physiology                                                                                                                             | BioRxiv | Basic Science or Translational | 2018-04-10 |
| 103 | Insufficient fumarase contributes to generating reactive oxygen species in Dahl salt sensitive rats                                                                                                      | BioRxiv | Basic Science or Translational | 2018-04-16 |
| 104 | Endothelial cells secreted ET-1 augments DN via inducing EM accumulation of MCs in ETBR-/- mice                                                                                                          | BioRxiv | Basic Science or Translational | 2018-04-18 |

|     |                                                                                                                                                                              |         |                                |            |
|-----|------------------------------------------------------------------------------------------------------------------------------------------------------------------------------|---------|--------------------------------|------------|
| 105 | Intra-tumor heterogeneity and clonal exclusivity in renal cell carcinoma                                                                                                     | BioRxiv | Basic Science or Translational | 2018-04-20 |
| 106 | PRESTO, a new tool for integrating large-scale -omics data and discovering disease-specific signatures                                                                       | BioRxiv | Basic Science or Translational | 2018-04-20 |
| 107 | Scarless repair of acute and chronic kidney injury in African Spiny mice ( <i>Acomys cahirinus</i> )                                                                         | BioRxiv | Basic Science or Translational | 2018-05-04 |
| 108 | Genetic analyses in UK Biobank identifies 78 novel loci associated with urinary biomarkers providing new insights into the biology of kidney function and chronic disease    | BioRxiv | Basic Science or Translational | 2018-05-05 |
| 109 | The landscape and diagnostic potential of T and B cell repertoire in Immunoglobulin A Nephropathy                                                                            | BioRxiv | Basic Science or Translational | 2018-05-10 |
| 110 | Arterial smooth muscle cell PKD2 (TRPP1) channels control systemic blood pressure                                                                                            | BioRxiv | Basic Science or Translational | 2018-05-11 |
| 111 | Lethality of leptospirosis depends on sex: male hamsters succumb to infection with lower doses of pathogenic <i>Leptospira</i>                                               | BioRxiv | Basic Science or Translational | 2018-05-15 |
| 112 | Molecular analysis of long non-coding RNA GAS5 and microRNA-34a expression signature in common solid tumors: A pilot study                                                   | BioRxiv | Basic Science or Translational | 2018-05-17 |
| 113 | Renoprotective effects Of Dexmedetomidine against ischemia-reperfusion injury in streptozotocin-induced diabetic rats                                                        | BioRxiv | Basic Science or Translational | 2018-05-18 |
| 114 | Molecular determinants of WNT9b responsiveness in nephron progenitor cells                                                                                                   | BioRxiv | Basic Science or Translational | 2018-05-22 |
| 115 | In vitro and In vivo characterization of NOSO-502, a novel inhibitor of bacterial translation                                                                                | BioRxiv | Basic Science or Translational | 2018-05-24 |
| 116 | Genome assembly and gene expression in the American black bear provides new insights into the renal response to hibernation                                                  | BioRxiv | Basic Science or Translational | 2018-05-27 |
| 117 | Machine characterization of rat toxin responses identifies disease states, tolerance mechanisms and organ to whole-body communication                                        | BioRxiv | Basic Science or Translational | 2018-05-28 |
| 118 | Transdermal, but not oral mucosa exposure, causes sublethal leptospirosis in mice                                                                                            | BioRxiv | Basic Science or Translational | 2018-05-30 |
| 119 | Anti-diuretic activity of a CAPA neuropeptide can compromise <i>Drosophila</i> chill tolerance                                                                               | BioRxiv | Basic Science or Translational | 2018-05-31 |
| 120 | Proteomic Analysis of ACE Inhibitory Peptides extracted from Fermented Goat Milk                                                                                             | BioRxiv | Basic Science or Translational | 2018-05-31 |
| 121 | Xanthine urolithiasis: Inhibitors of xanthine crystallization                                                                                                                | BioRxiv | Basic Science or Translational | 2018-05-31 |
| 122 | Establishment of epithelial and fibroblast cell lines from primary renal cancer nephrectomies                                                                                | BioRxiv | Basic Science or Translational | 2018-06-01 |
| 123 | Proteomic Analysis of Urine from California Sea Lions ( <i>Zalophus californianus</i> ): a Resource for Urinary Biomarker Discovery                                          | BioRxiv | Basic Science or Translational | 2018-06-02 |
| 124 | Metaproteomics Reveals Potential Mechanisms by which Dietary Resistant Starch Supplementation Attenuates Chronic Kidney Disease Progression in Rats                          | BioRxiv | Basic Science or Translational | 2018-06-06 |
| 125 | Injury-induced cold sensitization in <i>Drosophila</i> larvae involves behavioral shifts that require the TRP channels Pkd2 and Brv1                                         | BioRxiv | Basic Science or Translational | 2018-06-08 |
| 126 | Late B lymphocyte action in dysfunctional tissue repair following kidney injury and transplantation                                                                          | BioRxiv | Basic Science or Translational | 2018-06-08 |
| 127 | Transcriptional trajectories of human kidney disease progression                                                                                                             | BioRxiv | Basic Science or Translational | 2018-06-08 |
| 128 | Evaluation of the Luminex ARIES® System for the Detection and Quantification of BK virus DNA in Plasma and Serum Samples from Kidney Transplant Recipients                   | BioRxiv | Basic Science or Translational | 2018-06-12 |
| 129 | Tumor subclonal progression model for cancer hallmark acquisition                                                                                                            | BioRxiv | Basic Science or Translational | 2018-06-15 |
| 130 | Prophage induction, but not production of phage particles, is required for lethal disease in a microbiome-replete murine model of enterohemorrhagic <i>E. coli</i> infection | BioRxiv | Basic Science or Translational | 2018-06-16 |

|     |                                                                                                                                                                                      |         |                                |            |
|-----|--------------------------------------------------------------------------------------------------------------------------------------------------------------------------------------|---------|--------------------------------|------------|
| 131 | Eldecalcitol is more effective for promoting osteogenesis than alfacalcidol in Cyp27b1-knockout Mice                                                                                 | BioRxiv | Basic Science or Translational | 2018-06-18 |
| 132 | High glucose-induced ubiquitylation of G6PD leads to the injury of podocyte                                                                                                          | BioRxiv | Basic Science or Translational | 2018-06-20 |
| 133 | Parasitoid wasp venom elevates sorbitol and alters expression of metabolic genes in human kidney cells                                                                               | BioRxiv | Basic Science or Translational | 2018-06-20 |
| 134 | Nucleoporin 133 deficiency leads to glomerular damage in zebrafish                                                                                                                   | BioRxiv | Basic Science or Translational | 2018-06-21 |
| 135 | A novel mechanism of gland formation in zebrafish involving transdifferentiation of renal epithelial cells and live cell extrusion                                                   | BioRxiv | Basic Science or Translational | 2018-06-22 |
| 136 | Compendiums of Cancer Transcriptome for Machine Learning Applications                                                                                                                | BioRxiv | Basic Science or Translational | 2018-06-22 |
| 137 | Molecular basis for a novel systemic form of human hereditary apoA-I amyloidosis with vision loss                                                                                    | BioRxiv | Basic Science or Translational | 2018-06-22 |
| 138 | Bulk Tissue Cell Type Deconvolution with Multi-Subject Single-Cell Expression Reference                                                                                              | BioRxiv | Basic Science or Translational | 2018-06-26 |
| 139 | Extensive Expansion of the Speedy gene Family in Homininae and Functional Differentiation in Humans                                                                                  | BioRxiv | Basic Science or Translational | 2018-06-26 |
| 140 | Orchestration of Drosophila post-feeding physiology and behavior by the neuropeptide leucokinin                                                                                      | BioRxiv | Basic Science or Translational | 2018-06-26 |
| 141 | Two point mutations in the Hantaan virus glycoproteins afford the generation of a highly infectious recombinant vesicular stomatitis virus vector                                    | BioRxiv | Basic Science or Translational | 2018-06-26 |
| 142 | Exome wide association study on Albuminuria identifies a novel rare variant in CUBN and additional genes, in 33985 Europeans with and without diabetes                               | BioRxiv | Basic Science or Translational | 2018-06-27 |
| 143 | Identification and characterization of a phase-variable element that regulates the autotransporter UpaE in uropathogenic Escherichia coli                                            | BioRxiv | Basic Science or Translational | 2018-06-27 |
| 144 | DNMT1 in Six2 progenitor cells is essential for transposable element silencing and kidney development                                                                                | BioRxiv | Basic Science or Translational | 2018-06-29 |
| 145 | Whole genome scan reveals the multigenic basis of recent tidal marsh adaptation in a sparrow                                                                                         | BioRxiv | Basic Science or Translational | 2018-07-02 |
| 146 | NHA2 promotes cyst development in an in vitro model of polycystic kidney disease                                                                                                     | BioRxiv | Basic Science or Translational | 2018-07-07 |
| 147 | The immune cell landscape in kidneys of lupus nephritis patients                                                                                                                     | BioRxiv | Basic Science or Translational | 2018-07-07 |
| 148 | A non-coding genetic variant maximally associated with serum urate levels is functionally linked to HNF4A-dependent PDZK1 expression                                                 | BioRxiv | Basic Science or Translational | 2018-07-08 |
| 149 | An integrative systems biology and experimental approach identifies convergence of epithelial plasticity, metabolism, and autophagy to promote chemoresistance                       | BioRxiv | Basic Science or Translational | 2018-07-10 |
| 150 | Differential metabolic activity and discovery of therapeutic targets using summarized metabolic pathway models                                                                       | BioRxiv | Basic Science or Translational | 2018-07-11 |
| 151 | TP53 mutations as potential prognostic markers for specific cancers: Analysis of data from The Cancer Genome Atlas and the International Agency for Research on Cancer TP53 Database | BioRxiv | Basic Science or Translational | 2018-07-12 |
| 152 | Mapping In Vivo O-Glycoproteome Using Site-specific Extraction of O-linked glycopeptides (EXoO)                                                                                      | BioRxiv | Basic Science or Translational | 2018-07-13 |
| 153 | Chicken uric acid elimination via the uric acid transporters BCRP and MRP4 in the liver, kidneys, and intestines                                                                     | BioRxiv | Basic Science or Translational | 2018-07-18 |
| 154 | Identification of salivary and plasma biomarkers for obesity in children by non-targeted metabolomic analysis                                                                        | BioRxiv | Basic Science or Translational | 2018-07-18 |
| 155 | Development of an imaging toolbox to assess the therapeutic potential and biodistribution of macrophages in a mouse model of multiple organ dysfunction                              | BioRxiv | Basic Science or Translational | 2018-07-19 |
| 156 | Extracellular matrix regulates morphogenesis and function of ciliated sensory organs in Caenorhabditis elegans                                                                       | BioRxiv | Basic Science or Translational | 2018-07-24 |

|     |                                                                                                                                                                        |         |                                |            |
|-----|------------------------------------------------------------------------------------------------------------------------------------------------------------------------|---------|--------------------------------|------------|
| 157 | Expression profile analysis of circular RNAs in essential hypertension by microarray and bioinformatics                                                                | BioRxiv | Basic Science or Translational | 2018-07-25 |
| 158 | Towards an autologous iPSC-derived patient-on-a-chip                                                                                                                   | BioRxiv | Basic Science or Translational | 2018-07-25 |
| 159 | Cryptic Promoter Activation Drives POU5F1 (OCT4) Expression in Renal Cell Carcinoma                                                                                    | BioRxiv | Basic Science or Translational | 2018-07-27 |
| 160 | RNA-Seq and Protein Mass Spectrometry in Microdissected Kidney Tubules Reveal Signaling Processes that Initiate Lithium-Induced Diabetes Insipidus                     | BioRxiv | Basic Science or Translational | 2018-07-29 |
| 161 | Accurate Reference-Free Somatic Variant-Calling by Integrating Genomic, Sequencing and Population Data                                                                 | BioRxiv | Basic Science or Translational | 2018-08-02 |
| 162 | Deficiency of the Endocytic Protein Hip1 Leads to Decreased Gdpd3 expression, Low Phosphocholine, and Kypholordosis                                                    | BioRxiv | Basic Science or Translational | 2018-08-02 |
| 163 | Allele-specific RNA imaging shows that allelic imbalances can arise in tissues through transcriptional bursting                                                        | BioRxiv | Basic Science or Translational | 2018-08-07 |
| 164 | A conserved role of the insulin-like signaling pathway in uric acid pathologies revealed in <i>Drosophila melanogaster</i>                                             | BioRxiv | Basic Science or Translational | 2018-08-09 |
| 165 | HIF-2 $\alpha$ drives an intrinsic vulnerability to ferroptosis in clear cell renal cell carcinoma                                                                     | BioRxiv | Basic Science or Translational | 2018-08-09 |
| 166 | Role of the high-affinity leukotriene B4 receptor signaling in fibrosis after unilateral ureteral obstruction in mice                                                  | BioRxiv | Basic Science or Translational | 2018-08-13 |
| 167 | Comparing the metabolic fates of BALB/c mice maintained on cafeteria-style diets with differential nutritive values                                                    | BioRxiv | Basic Science or Translational | 2018-08-14 |
| 168 | JAK2 is highly expressed by cyst-lining cells and regulates cystogenesis                                                                                               | BioRxiv | Basic Science or Translational | 2018-08-21 |
| 169 | Dimethylarsenic acid (DMA) accumulation positively correlates with realgar-induced subchronic toxicity in rats                                                         | BioRxiv | Basic Science or Translational | 2018-08-22 |
| 170 | Protect TUDCA stimulated CKD-derived hMSCs against the CKD-Ischemic disease via upregulation of PrPC                                                                   | BioRxiv | Basic Science or Translational | 2018-08-28 |
| 171 | Association of SRB1, ITGB2 gene polymorphisms with coronary heart disease in Chinese Han population                                                                    | BioRxiv | Basic Science or Translational | 2018-08-29 |
| 172 | Anti-microRNA screen uncovers miR-17 family within miR-17~92 cluster as the primary driver of kidney cyst growth                                                       | BioRxiv | Basic Science or Translational | 2018-08-31 |
| 173 | Genotype-Phenotype Relations of the von Hippel-Lindau Tumor Suppressor Inferred from a Large-Scale Analysis of Disease Mutations and Interactors                       | BioRxiv | Basic Science or Translational | 2018-08-31 |
| 174 | PBRM1 regulates the stress response in epithelial cells                                                                                                                | BioRxiv | Basic Science or Translational | 2018-09-04 |
| 175 | hsegHMM: Hidden Markov Model-based Allele-specific Copy Number Alteration Analysis Accounting for Hypersegmentation                                                    | BioRxiv | Basic Science or Translational | 2018-09-06 |
| 176 | Rodent-borne bacterial infections in Gwangju, Korea                                                                                                                    | BioRxiv | Basic Science or Translational | 2018-09-07 |
| 177 | Dynamain binding protein is required for <i>Xenopus laevis</i> kidney development                                                                                      | BioRxiv | Basic Science or Translational | 2018-09-11 |
| 178 | Effect of intracerebroventricular epinephrine microinjection on blood pressure and urinary sodium handling in gestational protein-restricted rat adult male offspring  | BioRxiv | Basic Science or Translational | 2018-09-12 |
| 179 | Trans-ethnic genome-wide association study of kidney function provides novel insight into effector genes and causal effects on kidney-specific disease aetiologies     | BioRxiv | Basic Science or Translational | 2018-09-18 |
| 180 | A novel method for comparison of arterial remodeling in hypertension: quantification of arterial trees and recognition of remodeling patterns on histological sections | BioRxiv | Basic Science or Translational | 2018-09-21 |
| 181 | Inflammatory and JAK-STAT Pathways as Shared Molecular Targets for ANCA-Associated Vasculitis and Nephrotic Syndrome                                                   | BioRxiv | Basic Science or Translational | 2018-09-27 |
| 182 | Commensal gut bacteria convert the immunosuppressant tacrolimus to less potent metabolites                                                                             | BioRxiv | Basic Science or Translational | 2018-10-01 |

|     |                                                                                                                                                                |         |                                |            |
|-----|----------------------------------------------------------------------------------------------------------------------------------------------------------------|---------|--------------------------------|------------|
| 183 | Fate-mapping within human kidney organoids reveals conserved mammalian nephron progenitor lineage relationships                                                | BioRxiv | Basic Science or Translational | 2018-10-01 |
| 184 | Pan-cancer genomic amplifications underlie a Wnt hyperactivation phenotype associated with stem cell-like features leading to poor prognosis                   | BioRxiv | Basic Science or Translational | 2018-10-01 |
| 185 | Enhancing acute kidney injury regeneration by promoting cellular dedifferentiation in zebrafish                                                                | BioRxiv | Basic Science or Translational | 2018-10-04 |
| 186 | FoxM1 drives proximal tubule proliferation during repair from acute kidney injury                                                                              | BioRxiv | Basic Science or Translational | 2018-10-05 |
| 187 | Correlation of occludin protein mobility with paracellular leak pathway permeability in renal epithelia                                                        | BioRxiv | Basic Science or Translational | 2018-10-08 |
| 188 | Transcriptomic metaanalyses of autistic brains reveals shared gene expression and biological pathway abnormalities with cancer                                 | BioRxiv | Basic Science or Translational | 2018-10-08 |
| 189 | Tissue-specific genes as an underutilized resource in drug discovery                                                                                           | BioRxiv | Basic Science or Translational | 2018-10-14 |
| 190 | Association study of long-term kidney transplant rejection using whole-exome sequencing                                                                        | BioRxiv | Basic Science or Translational | 2018-10-16 |
| 191 | DNA Repair Gene Expression Adjusted by the PCNA Metagene Predicts Survival in Multiple Cancers                                                                 | BioRxiv | Basic Science or Translational | 2018-10-17 |
| 192 | The impact of tumor stromal architecture on therapy response and clinical progression                                                                          | BioRxiv | Basic Science or Translational | 2018-10-24 |
| 193 | Tfap2a is a novel gatekeeper of differentiation in renal progenitors during kidney development                                                                 | BioRxiv | Basic Science or Translational | 2018-11-02 |
| 194 | Genetic predisposition to hypouricemia on whole-exome sequencing analysis and its utilities in primary screening purposes                                      | BioRxiv | Basic Science or Translational | 2018-11-08 |
| 195 | TIM-1 Serves as a Nonredundant Receptor for Ebola Virus, Enhancing Viremia and Pathogenesis                                                                    | BioRxiv | Basic Science or Translational | 2018-11-08 |
| 196 | Cell-Type Selective Markers Represented in Whole-Kidney RNA-Seq Data                                                                                           | BioRxiv | Basic Science or Translational | 2018-11-09 |
| 197 | Cryo-EM structure of the receptor-activated TRPC5 ion channel at 2.9 angstrom resolution                                                                       | BioRxiv | Basic Science or Translational | 2018-11-11 |
| 198 | Organoid single-cell profiling identifies a transcriptional signature of glomerular disease                                                                    | BioRxiv | Basic Science or Translational | 2018-11-14 |
| 199 | Differential requirement for centriolar satellites in cilium formation among different vertebrate cells                                                        | BioRxiv | Basic Science or Translational | 2018-11-26 |
| 200 | Garcinia cambogia extract removes calcium oxalate kidney stones in both genetic and non-genetic Drosophila models of nephrolithiasis                           | BioRxiv | Basic Science or Translational | 2018-11-27 |
| 201 | The interaction between the tumour suppressor Dlg1 and the MAGUK protein CASK is required for oriented cell division in mammalian epithelia                    | BioRxiv | Basic Science or Translational | 2018-11-29 |
| 202 | The interplay between host genetics and the gut microbiome reveals common and distinct microbiome features for human complex diseases                          | BioRxiv | Basic Science or Translational | 2018-11-29 |
| 203 | The voltage sensing phosphatase (VSP) localizes to the apical membrane of kidney tubule epithelial cells                                                       | BioRxiv | Basic Science or Translational | 2018-11-30 |
| 204 | Small molecule docking of DNA repair proteins associated with cancer survival following PCNA metagene adjustment: A potential novel class of repair inhibitors | BioRxiv | Basic Science or Translational | 2018-12-03 |
| 205 | A comparison of gene expression and DNA methylation patterns across tissues and species                                                                        | BioRxiv | Basic Science or Translational | 2018-12-04 |
| 206 | Nifedipine Modulates Renal Lipogenesis via the AMPK-SREBP Transcriptional Pathways                                                                             | BioRxiv | Basic Science or Translational | 2018-12-04 |
| 207 | Renal medullary carcinomas depend upon SMARCB1 loss and are sensitive to proteasome inhibition                                                                 | BioRxiv | Basic Science or Translational | 2018-12-05 |
| 208 | Transcriptional Activation of Elephant Shark Mineralocorticoid Receptor by Corticosteroids, Progesterone and Spironolactone                                    | BioRxiv | Basic Science or Translational | 2018-12-06 |
| 209 | Identification of a novel Nucleobase-Ascorbate Transporter family member in fish and amphibians                                                                | BioRxiv | Basic Science or Translational | 2018-12-07 |



|     |                                                                                                                                                                                                      |         |                                |            |
|-----|------------------------------------------------------------------------------------------------------------------------------------------------------------------------------------------------------|---------|--------------------------------|------------|
| 210 | Mutations In PIK3C2A Cause Syndromic Short Stature, Skeletal Abnormalities, and Cataracts Associated With Ciliary Dysfunction                                                                        | BioRxiv | Basic Science or Translational | 2018-12-07 |
| 211 | Cyclosporine A inhibits MRTF-SRF signalling through Na <sup>+</sup> /K <sup>+</sup> ATPase inhibition & Actin remodelling                                                                            | BioRxiv | Basic Science or Translational | 2018-12-08 |
| 212 | Wnt/ $\beta$ -catenin signaling is required for the development of multiple nephron segments                                                                                                         | BioRxiv | Basic Science or Translational | 2018-12-08 |
| 213 | Genetically distinct clinical subsets, and associations with asthma and eosinophil abundance, within Eosinophilic Granulomatosis with Polyangiitis                                                   | BioRxiv | Basic Science or Translational | 2018-12-10 |
| 214 | Differential trafficking of albumin and IgG facilitated by the neonatal Fc receptor in podocytes in vitro and in vivo                                                                                | BioRxiv | Basic Science or Translational | 2018-12-12 |
| 215 | The effect of carnitine on preservation of renal cold ischemia in rats                                                                                                                               | BioRxiv | Basic Science or Translational | 2018-12-13 |
| 216 | The Influence of Magnetic Fields on Selected Physiological Parameters of Blood and Tissues in Mice                                                                                                   | BioRxiv | Basic Science or Translational | 2018-12-17 |
| 217 | Genome-wide association study of diabetic kidney disease highlights biology involved in renal basement membrane collagen                                                                             | BioRxiv | Basic Science or Translational | 2018-12-19 |
| 218 | Low-Density Lipoprotein Receptor-Mediated Lipidome-Transcriptome Reprogramming Impulses to Cisplatin Insensitivity                                                                                   | BioRxiv | Basic Science or Translational | 2018-12-21 |
| 219 | Dual prognostic role for 2-oxoglutarate oxygenases in ten diverse cancer types: Implications for cell cycle regulation and cell adhesion maintenance                                                 | BioRxiv | Basic Science or Translational | 2018-12-22 |
| 220 | Single nucleotide variant at the $\alpha\beta3$ integrin associated to Andes virus infection susceptibility                                                                                          | BioRxiv | Basic Science or Translational | 2018-12-22 |
| 221 | Bioprinted pluripotent stem cell-derived kidney organoids provide opportunities for high content screening                                                                                           | BioRxiv | Basic Science or Translational | 2018-12-23 |
| 222 | Inhibition of EZH2 ameliorates lupus-like disease in MRL/lpr mice                                                                                                                                    | BioRxiv | Basic Science or Translational | 2018-12-25 |
| 223 | miRNAs, target genes expression and morphological analysis on the heart in gestational protein-restricted offspring                                                                                  | BioRxiv | Basic Science or Translational | 2018-12-27 |
| 224 | A complex containing lysine-acetylated actin inhibits the formin INF2                                                                                                                                | BioRxiv | Basic Science or Translational | 2018-12-31 |
| 225 | Identification of activators of human fumarate hydratase by quantitative high-throughput screening                                                                                                   | BioRxiv | Basic Science or Translational | 2019-01-02 |
| 226 | The Role of the Wnt/PCP Formin Daam1 in Renal Ciliogenesis                                                                                                                                           | BioRxiv | Basic Science or Translational | 2019-01-04 |
| 227 | Inhibition of miR-22-3p reduces kidney disease associated with systemic lupus erythematosus                                                                                                          | BioRxiv | Basic Science or Translational | 2019-01-07 |
| 228 | Defining the dynamic chromatin landscape of nephron progenitors                                                                                                                                      | BioRxiv | Basic Science or Translational | 2019-01-08 |
| 229 | Urinary proteome of dogs with kidney injury during babesiosis                                                                                                                                        | BioRxiv | Basic Science or Translational | 2019-01-09 |
| 230 | Vps34 PI 3-kinase controls thyroid hormone production by regulating thyroglobulin iodination, lysosomal proteolysis and tissue homeostasis                                                           | BioRxiv | Basic Science or Translational | 2019-01-09 |
| 231 | DYRK1A-related intellectual disability: a syndrome associated with congenital anomalies of the kidney and urinary tract                                                                              | BioRxiv | Basic Science or Translational | 2019-01-10 |
| 232 | Kidney organoid reproducibility across multiple human iPSC lines and diminished off target cells after transplantation revealed by single cell transcriptomics                                       | BioRxiv | Basic Science or Translational | 2019-01-10 |
| 233 | Immunization of mice with chimeric antigens displaying selected epitopes confers protection against intestinal colonization and renal damage caused by Shiga toxin-producing Escherichia coli (STEC) | BioRxiv | Basic Science or Translational | 2019-01-11 |
| 234 | iPSC-derived Cancer Organoids Recapitulate Genomic and Phenotypic Alterations of c-met-mutated Hereditary Kidney Cancer                                                                              | BioRxiv | Basic Science or Translational | 2019-01-11 |
| 235 | Activated thiol Sepharose-based proteomic approach to globally quantify protein oxidation                                                                                                            | BioRxiv | Basic Science or Translational | 2019-01-13 |
| 236 | GWAS identifies nine nephrolithiasis susceptibility loci related with metabolic metabolic and crystallization pathways                                                                               | BioRxiv | Basic Science or Translational | 2019-01-13 |

|     |                                                                                                                                                                                                               |         |                                |            |
|-----|---------------------------------------------------------------------------------------------------------------------------------------------------------------------------------------------------------------|---------|--------------------------------|------------|
| 237 | Transcriptional landscape of DNA repair genes underpins a pan-cancer prognostic signature associated with cell cycle dysregulation and tumor hypoxia                                                          | BioRxiv | Basic Science or Translational | 2019-01-13 |
| 238 | Peptidoglycan Mediates Loa22 and Toll-like Receptor 2 Interactions in Pathogenic Leptospira                                                                                                                   | BioRxiv | Basic Science or Translational | 2019-01-14 |
| 239 | PKC regulates the production of fibroblast growth factor 23 (FGF23)                                                                                                                                           | BioRxiv | Basic Science or Translational | 2019-01-14 |
| 240 | MultiPLIER: a transfer learning framework for transcriptomics reveals systemic features of rare disease                                                                                                       | BioRxiv | Basic Science or Translational | 2019-01-15 |
| 241 | Investigation of the transcriptional profile of human kidneys during machine perfusion reveals potential benefits of haemoadsorption                                                                          | BioRxiv | Basic Science or Translational | 2019-01-16 |
| 242 | Deep phenotyping of a healthy human HAO1 knockout informs therapeutic development for primary hyperoxaluria type 1                                                                                            | BioRxiv | Basic Science or Translational | 2019-01-18 |
| 243 | Aberrations in Notch-Hedgehog signalling reveal cancer stem cells harbouring conserved oncogenic properties associated with hypoxia and immunoevasion                                                         | BioRxiv | Basic Science or Translational | 2019-01-21 |
| 244 | Discoidin Domain Receptor 1 (DDR1) Tyrosine Kinase is Upregulated in PKD Kidneys But Does Not Play a Role in the Pathogenesis of Polycystic Kidney Disease                                                    | BioRxiv | Basic Science or Translational | 2019-01-22 |
| 245 | Mitigative effects of Alpha-lipoic acid for the toxicity of Dimethoate in male rats                                                                                                                           | BioRxiv | Basic Science or Translational | 2019-01-23 |
| 246 | Proteolytic program-dependent functions are impaired in INF2-mediated focal segmental glomerulosclerosis                                                                                                      | BioRxiv | Basic Science or Translational | 2019-01-26 |
| 247 | Myocardin ablation in a cardiac-renal rat model                                                                                                                                                               | BioRxiv | Basic Science or Translational | 2019-01-28 |
| 248 | The Impact of Uremia and Intestinal Dysbiosis on Hepatic Drug Metabolism in a Rat Model of Progressive Chronic Kidney Disease                                                                                 | BioRxiv | Basic Science or Translational | 2019-01-29 |
| 249 | Genetic variants of calcium and vitamin D metabolism in kidney stone disease                                                                                                                                  | BioRxiv | Basic Science or Translational | 2019-01-30 |
| 250 | Escherichia coli O157:H7 responds to phosphate starvation by modifying LPS involved in biofilm formation                                                                                                      | BioRxiv | Basic Science or Translational | 2019-01-31 |
| 251 | Mechanical activation of TRPV4 channels controls albumin reabsorption by proximal tubule cells                                                                                                                | BioRxiv | Basic Science or Translational | 2019-02-01 |
| 252 | SUBSTRA: Supervised Bayesian Patient Stratification                                                                                                                                                           | BioRxiv | Basic Science or Translational | 2019-02-03 |
| 253 | Dual role of protease activated receptor 4 in acute kidney injury: contributing to renal injury and inflammation, while maintaining the renal filtration barrier upon acute renal ischemia reperfusion injury | BioRxiv | Basic Science or Translational | 2019-02-04 |
| 254 | Genetic variants disrupt human RGS14 binding to NHERF1 and regulation of NPT2A-mediated phosphate transport                                                                                                   | BioRxiv | Basic Science or Translational | 2019-02-05 |
| 255 | Generation of inducible SMARCAL1 knock-down iPSC to model severe Schimke immune-osseous dysplasia reveals a link between replication stress and altered expression of master differentiation genes            | BioRxiv | Basic Science or Translational | 2019-02-10 |
| 256 | METASPACE: A community-populated knowledge base of spatial metabolomes in health and disease                                                                                                                  | BioRxiv | Basic Science or Translational | 2019-02-13 |
| 257 | The down regulation of megalin/LRP2 by transforming growth factor beta (TGF- $\beta$ 1) is mediated by the SMAD2/3 signalling pathway                                                                         | BioRxiv | Basic Science or Translational | 2019-02-18 |
| 258 | Transketolase of Staphylococcus aureus is involved in the control of master regulators of stress response during infection                                                                                    | BioRxiv | Basic Science or Translational | 2019-02-18 |
| 259 | A functional landscape of chronic kidney disease entities from public transcriptomic data                                                                                                                     | BioRxiv | Basic Science or Translational | 2019-02-21 |
| 260 | BKV clearance time correlates with exhaustion state and T-cell receptor repertoire shape of BKV-specific T-cells in renal transplant patients                                                                 | BioRxiv | Basic Science or Translational | 2019-02-21 |
| 261 | Timing gone awry: distinct tumour suppressive and oncogenic roles of the circadian clock and crosstalk with hypoxia signalling in diverse malignancies                                                        | BioRxiv | Basic Science or Translational | 2019-02-21 |
| 262 | Identification and functional characterization of two novel mutations in KCNJ10 and PI4KB in SeSAME syndrome without electrolyte imbalance                                                                    | BioRxiv | Basic Science or Translational | 2019-02-22 |

|     |                                                                                                                                                                                                                           |         |                                |            |
|-----|---------------------------------------------------------------------------------------------------------------------------------------------------------------------------------------------------------------------------|---------|--------------------------------|------------|
| 263 | A Deep learning approach for Pan-Renal Cell Carcinoma classification and survival prediction from histopathology images                                                                                                   | BioRxiv | Basic Science or Translational | 2019-02-24 |
| 264 | Measuring single cell divisions in human cancers from multi-region sequencing data                                                                                                                                        | BioRxiv | Basic Science or Translational | 2019-02-25 |
| 265 | Sox6: A new modulator of renin expression during physiological conditions                                                                                                                                                 | BioRxiv | Basic Science or Translational | 2019-02-25 |
| 266 | Cancerous phenotypes associated with hypoxia-inducible factors are not influenced by the volatile anesthetic isoflurane in renal cell carcinoma                                                                           | BioRxiv | Basic Science or Translational | 2019-02-26 |
| 267 | The p21 dependent G2 arrest of the cell cycle in epithelial tubular cells links to the early stage of renal fibrosis                                                                                                      | BioRxiv | Basic Science or Translational | 2019-02-26 |
| 268 | Effect of environment on the evolutionary trajectories and growth characteristics of antibiotic-resistant Escherichia coli mutants                                                                                        | BioRxiv | Basic Science or Translational | 2019-02-28 |
| 269 | Harnessing patient-specific response dynamics to optimize evolutionary therapies for metastatic clear cell renal cell carcinoma – Learning to adapt Pan-cancer mutational landscape of the PPAR pathway reveals universal | BioRxiv | Basic Science or Translational | 2019-02-28 |
| 270 | patterns of dysregulated metabolism and interactions with tumor immunity and hypoxia                                                                                                                                      | BioRxiv | Basic Science or Translational | 2019-02-28 |
| 271 | The Microbial Metagenome and Tissue Composition in Mice with Microbiome-Induced Reductions in Bone Strength                                                                                                               | BioRxiv | Basic Science or Translational | 2019-03-01 |
| 272 | Uncovering the role of admixture in disease and drug response: Association of hepatocyte gene expression and DNA methylation with African Ancestry in African Americans                                                   | BioRxiv | Basic Science or Translational | 2019-03-01 |
| 273 | Impact of an intra-abdominal cooling device during open kidney transplantation in pigs                                                                                                                                    | BioRxiv | Basic Science or Translational | 2019-03-05 |
| 274 | A robotic platform for fluidically-linked human body-on-chips experimentation                                                                                                                                             | BioRxiv | Basic Science or Translational | 2019-03-06 |
| 275 | GSTM1 copy number is not associated with risk of kidney failure in a large cohort                                                                                                                                         | BioRxiv | Basic Science or Translational | 2019-03-06 |
| 276 | Urinary biomarker and histopathological evaluation of vancomycin and piperacillin-tazobactam nephrotoxicity in comparison with vancomycin in a rat model and a confirmatory cellular model                                | BioRxiv | Basic Science or Translational | 2019-03-06 |
| 277 | An ancient lineage of highly divergent parvoviruses infects both vertebrate and invertebrate hosts                                                                                                                        | BioRxiv | Basic Science or Translational | 2019-03-07 |
| 278 | Chestnut extract but not sodium salicylate decrease the severity of diarrhea and enterotoxigenic Escherichia coli F4 shedding in artificially infected piglets                                                            | BioRxiv | Basic Science or Translational | 2019-03-12 |
| 279 | Effects of enalapril and paricalcitol treatment on diabetic nephropathy and renal expressions of TNF- $\alpha$ , P53, Caspase-3 and Bcl-2 in STZ-induced diabetic rats                                                    | BioRxiv | Basic Science or Translational | 2019-03-13 |
| 280 | An immunoevasive strategy through clinically-relevant pan-cancer genomic and transcriptomic alterations of JAK-STAT signaling components                                                                                  | BioRxiv | Basic Science or Translational | 2019-03-14 |
| 281 | Prenatal diagnosis of HNF1B-associated renal cysts: Need to differentiate intragenic variants from 17q12 microdeletion syndrome?                                                                                          | BioRxiv | Basic Science or Translational | 2019-03-14 |
| 282 | Loss of Bardet-Biedl syndrome proteins causes synaptic aberrations in principal neurons                                                                                                                                   | BioRxiv | Basic Science or Translational | 2019-03-18 |
| 283 | Cross-platform meta-analysis reveals common matrisome variation associated with tumor genotypes and immunophenotypes in human cancers                                                                                     | BioRxiv | Basic Science or Translational | 2019-03-19 |
| 284 | Genomic Prediction of Complex Disease Risk                                                                                                                                                                                | BioRxiv | Basic Science or Translational | 2019-03-23 |
| 285 | Lipid Interactions of a Ciliary Membrane TRP Channel: Simulation and Structural Studies of Polycystin-2 (PC2)                                                                                                             | BioRxiv | Basic Science or Translational | 2019-03-26 |
| 286 | VHL Synthetic Lethality Signatures Uncovered by Genotype-specific CRISPR-Cas9 Screens                                                                                                                                     | BioRxiv | Basic Science or Translational | 2019-03-26 |
| 287 | Evaluation of the geographical utility of Eastern Russell's viper ( <i>Daboia siamensis</i> ) antivenom from Thailand and an assessment of its protective effects against venom-induced nephrotoxicity                    | BioRxiv | Basic Science or Translational | 2019-03-27 |

|     |                                                                                                                                                                  |         |                                |            |
|-----|------------------------------------------------------------------------------------------------------------------------------------------------------------------|---------|--------------------------------|------------|
| 288 | Use of human iPSCs and kidney organoids to develop a cysteamine/mTOR inhibition combination therapy to treat cystinosis                                          | BioRxiv | Basic Science or Translational | 2019-04-01 |
| 289 | Active mode of excretion across digestive tissues predates the origin of excretory organs                                                                        | BioRxiv | Basic Science or Translational | 2019-04-04 |
| 290 | Buffer Therapy in Acute Metabolic Acidosis: Effects on Glomerular Permeability and Acid-Base Status                                                              | BioRxiv | Basic Science or Translational | 2019-04-04 |
| 291 | Identification and characterization of OmpT-like proteases in uropathogenic Escherichia coli clinical isolates                                                   | BioRxiv | Basic Science or Translational | 2019-04-04 |
| 292 | Temporal proteomic analysis of BK polyomavirus infection reveals virus-induced G2 arrest and highly effective evasion of innate immune sensing                   | BioRxiv | Basic Science or Translational | 2019-04-07 |
| 293 | A Comprehensive Molecular Portrait of Human Urine-derived Renal Progenitor Cells                                                                                 | BioRxiv | Basic Science or Translational | 2019-04-08 |
| 294 | In-Silico Analysis of nsSNPs Associated with CYP11B2 Gene                                                                                                        | BioRxiv | Basic Science or Translational | 2019-04-08 |
| 295 | Stem cell delivery to kidney via minimally invasive ultrasound-guided renal artery injection in mice                                                             | BioRxiv | Basic Science or Translational | 2019-04-16 |
| 296 | A Bigenic mouse model of FSGS reveals perturbed pathways in podocytes, mesangial cells and endothelial cells                                                     | BioRxiv | Basic Science or Translational | 2019-04-18 |
| 297 | APOL1-G0 protects podocytes in a mouse model of HIV-associated nephropathy                                                                                       | BioRxiv | Basic Science or Translational | 2019-04-18 |
| 298 | Discovery of functional alternatively spliced PKM transcripts in human cancers                                                                                   | BioRxiv | Basic Science or Translational | 2019-04-18 |
| 299 | Functional promoter polymorphisms govern the differential expression of HMG-CoA Reductase gene in rat models of essential hypertension                           | BioRxiv | Basic Science or Translational | 2019-04-19 |
| 300 | Kidney osteoclast factors and matrix metalloproteinase expression in a mice model of diet-induced obesity and diabetes                                           | BioRxiv | Basic Science or Translational | 2019-04-22 |
| 301 | Growth hormone induces TGF- $\beta$ 1 in glomerular podocytes: Implications in podocytopathy and proteinuria                                                     | BioRxiv | Basic Science or Translational | 2019-04-23 |
| 302 | Lowe Syndrome-linked endocytic adaptors direct membrane cycling kinetics with OCRL in Dictyostelium discoideum                                                   | BioRxiv | Basic Science or Translational | 2019-04-24 |
| 303 | Characterization and function of medium and large extracellular vesicles from plasma and urine by surface antigens and Annexin V                                 | BioRxiv | Basic Science or Translational | 2019-04-30 |
| 304 | Fission yeast TRP channel Pkd2p localizes to the cleavage furrow and regulates cell separation during cytokinesis                                                | BioRxiv | Basic Science or Translational | 2019-04-30 |
| 305 | APOL1 is not expressed in proximal tubules and is not filtered                                                                                                   | BioRxiv | Basic Science or Translational | 2019-05-02 |
| 306 | Glomerulosclerosis and kidney failure in a mouse model of monoclonal immunoglobulin light-chain deposition disease                                               | BioRxiv | Basic Science or Translational | 2019-05-02 |
| 307 | Unexpected activity of oral fosfomycin against resistant strains of Escherichia coli in murine pyelonephritis                                                    | BioRxiv | Basic Science or Translational | 2019-05-05 |
| 308 | Effect of high-salt diet on mean arterial pressure, renal epithelial sodium channels and aquaporin subunits expression levels in Spontaneously Hypertensive Rats | BioRxiv | Basic Science or Translational | 2019-05-07 |
| 309 | Allelic imbalance reveals widespread germline-somatic regulatory differences and prioritizes risk loci in Renal Cell Carcinoma                                   | BioRxiv | Basic Science or Translational | 2019-05-08 |
| 310 | A conserved regulatory program drives emergence of the lateral plate mesoderm                                                                                    | BioRxiv | Basic Science or Translational | 2019-05-09 |
| 311 | Bubble Trouble: Conquering Microbubble Limitations in Contrast Enhanced Ultrasound Imaging by Nature-Inspired Ultrastable Echogenic Nanobubbles                  | BioRxiv | Basic Science or Translational | 2019-05-09 |
| 312 | Cell cycle regulators control mesoderm specification in human pluripotent stem cells                                                                             | BioRxiv | Basic Science or Translational | 2019-05-09 |
| 313 | Nuclear Expression and DNA Binding Capacity of Receptor for Advanced Glycation End Products in Renal Tissue                                                      | BioRxiv | Basic Science or Translational | 2019-05-09 |
| 314 | A Phenome-wide Mendelian Randomisation study on genetically determined serum urate levels in UK Biobank cohort                                                   | BioRxiv | Basic Science or Translational | 2019-05-10 |

|     |                                                                                                                                                                      |         |                                |            |
|-----|----------------------------------------------------------------------------------------------------------------------------------------------------------------------|---------|--------------------------------|------------|
| 315 | Some common pathways perturbed in septic shock and cancer                                                                                                            | BioRxiv | Basic Science or Translational | 2019-05-10 |
| 316 | Drug-resistant epimutants exhibit organ-specific stability and induction during murine infections caused by the human fungal pathogen <i>Mucor circinelloides</i>    | BioRxiv | Basic Science or Translational | 2019-05-13 |
| 317 | Animal model and therapeutic prospects for left ventricular hypertrophy and associated renal complication                                                            | BioRxiv | Basic Science or Translational | 2019-05-14 |
| 318 | RISC: robust integration of single-cell RNA-seq datasets with different extents of cell cluster overlap                                                              | BioRxiv | Basic Science or Translational | 2019-05-14 |
| 319 | Assessment of chemotherapy-induced organ damage with 68Ga-labeled duramycin                                                                                          | BioRxiv | Basic Science or Translational | 2019-05-17 |
| 320 | Structural equation modeling for hypertension and type 2 diabetes based on multiple SNPs and multiple phenotypes                                                     | BioRxiv | Basic Science or Translational | 2019-05-18 |
| 321 | Calcium Sensing Receptor Common Variants Influence the Effects of Serum Calcium on Coronary Artery Disease Risks                                                     | BioRxiv | Basic Science or Translational | 2019-05-21 |
| 322 | Cellular and Molecular Probing of Intact Transparent Human Organs                                                                                                    | BioRxiv | Basic Science or Translational | 2019-05-21 |
| 323 | MBOAT7-Driven Phosphatidylinositol Remodeling Promotes the Progression of Clear Cell Renal Carcinoma                                                                 | BioRxiv | Basic Science or Translational | 2019-05-23 |
| 324 | Unraveling the functional role of the orphan solute carrier, SLC22A24 in the transport of steroid conjugates through metabolomic and genome-wide association studies | BioRxiv | Basic Science or Translational | 2019-05-23 |
| 325 | A cell-free DNA metagenomic sequencing assay that integrates the damage response to infection                                                                        | BioRxiv | Basic Science or Translational | 2019-05-24 |
| 326 | Metabolic reprogramming and elevation of glutathione in chromophobe renal cell carcinomas                                                                            | BioRxiv | Basic Science or Translational | 2019-05-24 |
| 327 | The Single Cell Transcriptomic Landscape of Early Human Diabetic Nephropathy                                                                                         | BioRxiv | Basic Science or Translational | 2019-05-24 |
| 328 | Papillary renal cell carcinomas rewire glutathione metabolism and are deficient in anabolic glucose synthesis                                                        | BioRxiv | Basic Science or Translational | 2019-05-27 |
| 329 | Phosphatidylinositol Cycle Disruption is Central to Atypical Hemolytic-Uremic Syndrome Caused by Diacylglycerol Kinase Epsilon Deficiency                            | BioRxiv | Basic Science or Translational | 2019-05-27 |
| 330 | Extra-cellular matrix induced by steroids through a G-protein coupled receptor in a <i>Drosophila</i> model of renal fibrosis                                        | BioRxiv | Basic Science or Translational | 2019-05-29 |
| 331 | Inhibition of Bruton's tyrosine kinase reduces NF- $\kappa$ B and NLRP3 inflammasome activity preventing insulin resistance and microvascular disease                | BioRxiv | Basic Science or Translational | 2019-06-04 |
| 332 | Calcium dobesilate reduces VEGF signaling by interfering with heparan sulfate binding site and protects from vascular complications in diabetic mice                 | BioRxiv | Basic Science or Translational | 2019-06-05 |
| 333 | Genetics of 38 blood and urine biomarkers in the UK Biobank                                                                                                          | BioRxiv | Basic Science or Translational | 2019-06-05 |
| 334 | Purinergic signaling is enhanced in the absence of UT-A1 and UT-A3                                                                                                   | BioRxiv | Basic Science or Translational | 2019-06-06 |
| 335 | The landscape of T cell infiltration in human cancer and its association with antigen presenting gene expression                                                     | BioRxiv | Basic Science or Translational | 2019-06-06 |
| 336 | From expression footprints to causal pathways: contextualizing large signaling networks with CARNIVAL                                                                | BioRxiv | Basic Science or Translational | 2019-06-07 |
| 337 | Targeted Clinical Metabolomics Platform for the Stratification of Diabetic Patients                                                                                  | BioRxiv | Basic Science or Translational | 2019-06-09 |
| 338 | Control iPSC lines with clinically annotated genetic variants for versatile multi-lineage differentiation                                                            | BioRxiv | Basic Science or Translational | 2019-06-10 |
| 339 | Integrative analysis reveals RNA G-Quadruplexes in UTRs are selectively constrained and enriched for functional associations                                         | BioRxiv | Basic Science or Translational | 2019-06-11 |
| 340 | The ciliary membrane of polarized epithelial cells stems from a midbody remnant-associated membrane patch with condensed nanodomains                                 | BioRxiv | Basic Science or Translational | 2019-06-11 |
| 341 | Genetic determinants of lipids and cardiovascular disease outcomes: a wide-angled Mendelian randomization investigation                                              | BioRxiv | Basic Science or Translational | 2019-06-14 |

|     |                                                                                                                                                                                       |         |                                |            |
|-----|---------------------------------------------------------------------------------------------------------------------------------------------------------------------------------------|---------|--------------------------------|------------|
| 342 | In-vivo targeted tagging of RNA isolates cell specific transcriptional responses to environmental stimuli and identifies liver-to-adipose RNA transfer                                | BioRxiv | Basic Science or Translational | 2019-06-14 |
| 343 | Gene modules associated with human diseases revealed by network analysis                                                                                                              | BioRxiv | Basic Science or Translational | 2019-06-15 |
| 344 | Cluster analysis on high dimensional RNA-seq data with applications to cancer research - An evaluation study                                                                          | BioRxiv | Basic Science or Translational | 2019-06-18 |
| 345 | Single Cell Profiling Reveals Sex, Lineage and Regional Diversity in the Mouse Kidney                                                                                                 | BioRxiv | Basic Science or Translational | 2019-06-18 |
| 346 | A Hidden Markov Modeling Approach for Identifying Tumor Subclones in Next-Generation Sequencing Studies                                                                               | BioRxiv | Basic Science or Translational | 2019-06-20 |
| 347 | Analysis of the three dimensional structure of the kidney glomerulus capillary network                                                                                                | BioRxiv | Basic Science or Translational | 2019-06-20 |
| 348 | GDF15 and the beneficial actions of metformin in pre-diabetes                                                                                                                         | BioRxiv | Basic Science or Translational | 2019-06-21 |
| 349 | Norvaline reduces blood pressure and induces diuresis in rats with inherited stress-induced arterial hypertension                                                                     | BioRxiv | Basic Science or Translational | 2019-06-21 |
| 350 | Di-Ras2 Promotes Renal Cell Carcinoma Formation by Activating the MAPK Pathway in the Absence of VHL                                                                                  | BioRxiv | Basic Science or Translational | 2019-06-27 |
| 351 | MiR-9-5p protects from kidney fibrosis by metabolic reprogramming                                                                                                                     | BioRxiv | Basic Science or Translational | 2019-06-28 |
| 352 | Single-cell RNA sequencing reveals mRNA splice isoform switching during kidney development                                                                                            | BioRxiv | Basic Science or Translational | 2019-07-01 |
| 353 | Macropinocytosis and Clathrin-Dependent Endocytosis Play Pivotal Roles for the Infectious Entry of Puumala Virus                                                                      | BioRxiv | Basic Science or Translational | 2019-07-05 |
| 354 | Molecular Architecture of the Bardet-Biedl Syndrome Protein 2-7-9 Subcomplex                                                                                                          | BioRxiv | Basic Science or Translational | 2019-07-11 |
| 355 | Sub-nucleosomal organization in urine cell-free DNA                                                                                                                                   | BioRxiv | Basic Science or Translational | 2019-07-11 |
| 356 | Approaches by Rhodotorula mucilaginosa from a chronic kidney disease patient for elucidating the pathogenicity profile by this emergent species                                       | BioRxiv | Basic Science or Translational | 2019-07-12 |
| 357 | Multiple acyl-CoA thioesterases occupy distinct functional niches within the mitochondrial matrix                                                                                     | BioRxiv | Basic Science or Translational | 2019-07-16 |
| 358 | Heparanase-2 protects from endothelial injury by inhibiting TLR4 signaling                                                                                                            | BioRxiv | Basic Science or Translational | 2019-07-17 |
| 359 | Variants in the degron of AFF3 cause a multi-system disorder with mesomelic dysplasia, horseshoe kidney and developmental and epileptic encephalopathy                                | BioRxiv | Basic Science or Translational | 2019-07-17 |
| 360 | Platelet Thrombus Formation in eHUS is Prevented by Anti-MBL2                                                                                                                         | BioRxiv | Basic Science or Translational | 2019-07-18 |
| 361 | Nutritive diet becomes unhealthy if taken in a wrong ratio: Scientific validation of Ayurvedic concept of "incompatible diet" (Virruhd Aahar)                                         | BioRxiv | Basic Science or Translational | 2019-07-19 |
| 362 | Prolonged podocyte depletion in larval zebrafish resembles mammalian focal and segmental glomerulosclerosis                                                                           | BioRxiv | Basic Science or Translational | 2019-07-19 |
| 363 | Globally elevating the AGE clearance receptor, OST48, does not protect against the development of diabetic kidney disease, despite improving insulin secretion                        | BioRxiv | Basic Science or Translational | 2019-07-22 |
| 364 | The AGE receptor, OST48 drives podocyte foot process effacement and basement membrane expansion in experimental diabetic kidney disease via promotion of endoplasmic reticulum stress | BioRxiv | Basic Science or Translational | 2019-07-22 |
| 365 | ADCK4 deficiency destabilizes the coenzyme Q complex, which is rescued by 2,4-dihydroxybenzoic acid treatment                                                                         | BioRxiv | Basic Science or Translational | 2019-07-23 |
| 366 | A polygenic and phenotypic risk prediction for Polycystic Ovary Syndrome evaluated by Phenome-wide association studies                                                                | BioRxiv | Basic Science or Translational | 2019-07-24 |
| 367 | Age-related Gene Expression Signatures (AGES) in rats demonstrate early, late, and linear transcriptional changes from multiple tissues                                               | BioRxiv | Basic Science or Translational | 2019-07-28 |
| 368 | Joint reconstruction of cis-regulatory interaction networks across multiple tissues using single-cell chromatin accessibility data                                                    | BioRxiv | Basic Science or Translational | 2019-07-31 |

|     |                                                                                                                                                  |         |                                |            |
|-----|--------------------------------------------------------------------------------------------------------------------------------------------------|---------|--------------------------------|------------|
| 369 | LUZP1, a novel regulator of primary cilia and the actin cytoskeleton, is altered in Townes-Brocks Syndrome                                       | BioRxiv | Basic Science or Translational | 2019-07-31 |
| 370 | Ureteric Bud Cells Programmed from Embryonic Stem Cells Obtain Competence for Secondary Induction in the Kidney                                  | BioRxiv | Basic Science or Translational | 2019-08-01 |
| 371 | Pan-Cancer Exploration of mRNA Mediated Dysregulated Pathways in the Cancer Genomics Cloud                                                       | BioRxiv | Basic Science or Translational | 2019-08-03 |
| 372 | Stem cell models identify lineage-specific catabolic signaling, neoplastic mechanisms and therapeutic vulnerabilities in tuberous sclerosis      | BioRxiv | Basic Science or Translational | 2019-08-03 |
| 373 | Deficiency in the endocytic adaptor protein PHETA1/2 impairs renal and craniofacial development                                                  | BioRxiv | Basic Science or Translational | 2019-08-06 |
| 374 | Trans-epithelial Fluid Pumping Performance of Renal Epithelial Cells and Mechanics of Cystic Expansion                                           | BioRxiv | Basic Science or Translational | 2019-08-06 |
| 375 | Impact of Candida auris infection in a neutropenic murine model                                                                                  | BioRxiv | Basic Science or Translational | 2019-08-10 |
| 376 | Molecular signatures for inflammation vary across cancer types and correlate significantly with tumor stage, gender and vital status of patients | BioRxiv | Basic Science or Translational | 2019-08-12 |
| 377 | Emodin Attenuates Renal Interstitial Fibrosis via Regulation of TIMP1/MM9 Pathway in Rats                                                        | BioRxiv | Basic Science or Translational | 2019-08-15 |
| 378 | Genetic Background Dominates Fibrotic Aortic Remodeling During Angiotensin-Induced Hypertension in Mice                                          | BioRxiv | Basic Science or Translational | 2019-08-15 |
| 379 | MKPV (aka MuCPV) and related chapparroviruses are nephro-tropic and encode novel accessory proteins p15 and NS2                                  | BioRxiv | Basic Science or Translational | 2019-08-15 |
| 380 | Post-Transcriptional Bone Morphogenetic Protein 2 (BMP2) Gene Regulation in Aorta                                                                | BioRxiv | Basic Science or Translational | 2019-08-15 |
| 381 | Post-transcriptional regulation of aortic calcification in KLOTHO deficient mice: impact of miR-145 and miR-378                                  | BioRxiv | Basic Science or Translational | 2019-08-15 |
| 382 | Tandem Requirement for Full Renal D1R and D5R Activity                                                                                           | BioRxiv | Basic Science or Translational | 2019-08-15 |
| 383 | Effects of Shift Work on the Carotid Artery and Cerebral Blood Flow of Spontaneously Hypertensive Rats and Wistar-Kyoto Rats                     | BioRxiv | Basic Science or Translational | 2019-08-20 |
| 384 | Embryonic and foetal expression patterns of the ciliopathy gene CEP164                                                                           | BioRxiv | Basic Science or Translational | 2019-08-20 |
| 385 | Megakaryocytes Display Innate Immune Cell Functions and Respond during Sepsis                                                                    | BioRxiv | Basic Science or Translational | 2019-08-21 |
| 386 | Vertical sleeve gastrectomy lowers kidney SGLT2 expression in the mouse                                                                          | BioRxiv | Basic Science or Translational | 2019-08-21 |
| 387 | A novel fully-human potency-matched dual cytokine-antibody fusion protein targets carbonic anhydrase IX in renal cell carcinomas                 | BioRxiv | Basic Science or Translational | 2019-08-22 |
| 388 | Genomic dissection of 43 serum urate-associated loci provides multiple insights into molecular mechanisms of urate control                       | BioRxiv | Basic Science or Translational | 2019-08-22 |
| 389 | The generation of plasma cells and CD27-IgD- B cells during Hantavirus infection are associated with distinct pathological findings              | BioRxiv | Basic Science or Translational | 2019-08-22 |
| 390 | Spectroscopy and Machine Learning Based Rapid Point-of-Care Assessment of Core Needle Cancer Biopsies                                            | BioRxiv | Basic Science or Translational | 2019-08-24 |
| 391 | Stochastic model of BKPy Virus replication and assembly                                                                                          | BioRxiv | Basic Science or Translational | 2019-08-24 |
| 392 | A geometry-based model describes lumen stability in epithelial cells                                                                             | BioRxiv | Basic Science or Translational | 2019-08-28 |
| 393 | Integrative framework of cross-module deep biomarker for the prognosis of clear cell renal cell carcinoma                                        | BioRxiv | Basic Science or Translational | 2019-08-28 |
| 394 | Transcriptomes of major renal collecting-duct cell types in mouse identified by single-cell RNA-Seq                                              | BioRxiv | Basic Science or Translational | 2019-08-31 |
| 395 | Connecting Histopathology Imaging and Proteomics in Kidney Cancer through Machine Learning                                                       | BioRxiv | Basic Science or Translational | 2019-09-05 |
| 396 | ERR agonism reverses mitochondrial dysfunction and inflammation in the aging kidney                                                              | BioRxiv | Basic Science or Translational | 2019-09-05 |

|     |                                                                                                                                                                |         |                                |            |
|-----|----------------------------------------------------------------------------------------------------------------------------------------------------------------|---------|--------------------------------|------------|
| 397 | Interleukin 11 expression causes murine inflammatory bowel disease                                                                                             | BioRxiv | Basic Science or Translational | 2019-09-05 |
| 398 | Loss of ELK1 has differential effects on age-dependent organ fibrosis and integrin expression                                                                  | BioRxiv | Basic Science or Translational | 2019-09-05 |
| 399 | Asynchronous mixing of kidney progenitor cells potentiates nephrogenesis in organoids                                                                          | BioRxiv | Basic Science or Translational | 2019-09-08 |
| 400 | Notch signaling regulates Akap12 expression and primary cilia length during renal tubule morphogenesis                                                         | BioRxiv | Basic Science or Translational | 2019-09-09 |
| 401 | Polygenic Risk Scores for Cardio-renal-metabolic Diseases in the Penn Medicine Biobank                                                                         | BioRxiv | Basic Science or Translational | 2019-09-09 |
| 402 | When two cells are better than one: specialized stellate cells provide a privileged route for uniquely rapid water flux in Drosophila renal tubule             | BioRxiv | Basic Science or Translational | 2019-09-10 |
| 403 | Comprehensive characterisation of cell-free tumour DNA in plasma and urine of patients with renal tumours                                                      | BioRxiv | Basic Science or Translational | 2019-09-11 |
| 404 | Establishing RPTE-derived cell lines expressing hTERT for studying BK polyomavirus                                                                             | BioRxiv | Basic Science or Translational | 2019-09-14 |
| 405 | Kinomorphs: Shape-shifting tissues for developmental engineering                                                                                               | BioRxiv | Basic Science or Translational | 2019-09-14 |
| 406 | miRCoop: Identifying Cooperating miRNAs via Kernel Based Interaction Tests                                                                                     | BioRxiv | Basic Science or Translational | 2019-09-14 |
| 407 | Tumor cell-derived lymphotoxin alpha triggers metastatic extravasation through TNFRs/cIAP1                                                                     | BioRxiv | Basic Science or Translational | 2019-09-14 |
| 408 | A primitive type of renin-expressing lymphocyte protects the organism against infections                                                                       | BioRxiv | Basic Science or Translational | 2019-09-16 |
| 409 | Active transport of brilliant blue FCF across the Drosophila midgut and Malpighian tubule epithelia                                                            | BioRxiv | Basic Science or Translational | 2019-09-18 |
| 410 | Coagulopathy signature precedes and predicts severity of end-organ heat stroke pathology in a mouse model                                                      | BioRxiv | Basic Science or Translational | 2019-09-18 |
| 411 | Genome-wide selection scan in the Kuwaiti population identifies a TNKS haplotype linked to metabolic traits and hypertension                                   | BioRxiv | Basic Science or Translational | 2019-09-18 |
| 412 | Inter-Species Differences in the Response of Sinus Node Cellular Pacemaking to Changes of Extracellular Calcium                                                | BioRxiv | Basic Science or Translational | 2019-09-18 |
| 413 | The investigation of the role of VHL-HIF signaling in DNA repair and apoptosis in zebrafish                                                                    | BioRxiv | Basic Science or Translational | 2019-09-18 |
| 414 | Inter- and intraspecific differences in Drosophila cold tolerance are linked to hindgut reabsorption capacity                                                  | BioRxiv | Basic Science or Translational | 2019-09-19 |
| 415 | Profiling APOL1 Nephropathy Risk Variants in Genome-Edited Kidney Organoids with Single-Cell Transcriptomics                                                   | BioRxiv | Basic Science or Translational | 2019-09-24 |
| 416 | Translational efficiency across healthy and tumor tissues is proliferation-related                                                                             | BioRxiv | Basic Science or Translational | 2019-09-25 |
| 417 | Clear Cell Renal Cell Carcinoma with Biallelic Inactivation of CDKN2A/B on 9p21 have Distinct Gene Expression Signature and are Associated with Poor Prognosis | BioRxiv | Basic Science or Translational | 2019-09-26 |
| 418 | Machine learning guided association of adverse drug reactions with in vitro target-based pharmacology                                                          | BioRxiv | Basic Science or Translational | 2019-09-27 |
| 419 | Systemic muscle wasting and coordinated tumour response drive tumourigenesis                                                                                   | BioRxiv | Basic Science or Translational | 2019-09-27 |
| 420 | Microvasculopathy And Soft Tissue Calcification In Mice Are Governed by Fetuin-A, Pyrophosphate And Magnesium                                                  | BioRxiv | Basic Science or Translational | 2019-10-01 |
| 421 | Spironolactone but not Eplerenone Exacerbates Cisplatin Nephrotoxicity                                                                                         | BioRxiv | Basic Science or Translational | 2019-10-02 |
| 422 | Historical recombination variability contributes to deciphering the genetic basis of phenotypic traits                                                         | BioRxiv | Basic Science or Translational | 2019-10-03 |
| 423 | Tissue-Specific Alteration of Metabolic Pathways Influences Glycemic Regulation                                                                                | BioRxiv | Basic Science or Translational | 2019-10-03 |



|     |                                                                                                                                                              |         |                                |            |
|-----|--------------------------------------------------------------------------------------------------------------------------------------------------------------|---------|--------------------------------|------------|
| 424 | Microvasculopathy, Luminal Calcification and Premature Aging in Fetuin-A Deficient Mice                                                                      | BioRxiv | Basic Science or Translational | 2019-10-04 |
| 425 | A detailed graphical and computational model of the mammalian renal circadian clock                                                                          | BioRxiv | Basic Science or Translational | 2019-10-07 |
| 426 | Evolution of the DAN gene family in vertebrates                                                                                                              | BioRxiv | Basic Science or Translational | 2019-10-07 |
| 427 | Minimally invasive classification of pediatric solid tumors using reduced representation bisulfite sequencing of cell-free DNA: a proof-of-principle study   | BioRxiv | Basic Science or Translational | 2019-10-08 |
| 428 | An anti-diuretic hormone receptor in the human disease vector, <i>Aedes aegypti</i> : identification, expression analysis and functional deorphanization     | BioRxiv | Basic Science or Translational | 2019-10-10 |
| 429 | Panel Sequencing in Uterine Leiomyomas identifies Missense Mutations associated with immunohistochemical Fumarate Hydratase (FH)-Loss                        | BioRxiv | Basic Science or Translational | 2019-10-10 |
| 430 | Collagen I weakly interacts with the $\beta$ -sheets of $\beta$ 2-microglobulin and enhances conformational exchange to induce amyloid formation             | BioRxiv | Basic Science or Translational | 2019-10-11 |
| 431 | MetAP2 inhibition reduces food intake and body weight in a ciliopathy mouse model of obesity                                                                 | BioRxiv | Basic Science or Translational | 2019-10-13 |
| 432 | Cryo-EM structure of the potassium-chloride cotransporter KCC4 in lipid nanodiscs                                                                            | BioRxiv | Basic Science or Translational | 2019-10-14 |
| 433 | Impaired renal gluconeogenesis is a major determinant of acute kidney injury associated mortality                                                            | BioRxiv | Basic Science or Translational | 2019-10-16 |
| 434 | Analysis the Detailed Process of Glomerular Capillary Formation Using Immunofluorescence Perform With Ultrathick Section                                     | BioRxiv | Basic Science or Translational | 2019-10-18 |
| 435 | Erosion of the Epigenetic Landscape and Loss of Cellular Identity as a Cause of Aging in Mammals                                                             | BioRxiv | Basic Science or Translational | 2019-10-19 |
| 436 | Personalized Network Modeling of the Pan-Cancer Patient and Cell Line Interactome                                                                            | BioRxiv | Basic Science or Translational | 2019-10-21 |
| 437 | Systematic identification of A-to-I editing associated regulators from multiple human cancers                                                                | BioRxiv | Basic Science or Translational | 2019-10-21 |
| 438 | Yolk-Sac-Derived Macrophages Progressively Expand in the Mouse Kidney with Age                                                                               | BioRxiv | Basic Science or Translational | 2019-10-21 |
| 439 | Characterization of splice isoform switching during human kidney development                                                                                 | BioRxiv | Basic Science or Translational | 2019-10-24 |
| 440 | Hypoxia mediated regulation of mitochondrial transcription factors: Implications of hypertensive renal physiology                                            | BioRxiv | Basic Science or Translational | 2019-10-24 |
| 441 | Integrative QTL analysis of gene expression and chromatin accessibility identifies multi-tissue patterns of genetic regulation                               | BioRxiv | Basic Science or Translational | 2019-10-25 |
| 442 | Analysis of putative cis-regulatory elements regulating blood pressure variation                                                                             | BioRxiv | Basic Science or Translational | 2019-10-27 |
| 443 | High-phytate/low-calcium diet is a risk factor for crystal nephropathies, renal phosphate wasting, and bone loss                                             | BioRxiv | Basic Science or Translational | 2019-10-29 |
| 444 | Towards Staining Independent Segmentation of Glomerulus from Histopathological Images of Kidney                                                              | BioRxiv | Basic Science or Translational | 2019-10-29 |
| 445 | Tumour suppressor WT1 regulates the let-7-Igf1r axis in kidney mesenchyme                                                                                    | BioRxiv | Basic Science or Translational | 2019-10-30 |
| 446 | An abundant quiescent stem cell population in <i>Drosophila</i> Malpighian tubules protects principal cells from kidney stones                               | BioRxiv | Basic Science or Translational | 2019-10-31 |
| 447 | Foxi1 inactivation rescues loss of principal cell fate selection in Hes1-deficient kidneys but does not ensure maintenance of principal cell gene expression | BioRxiv | Basic Science or Translational | 2019-10-31 |
| 448 | Mapping the Immune Landscape of Clear Cell Renal Cell Carcinoma by Single-Cell RNA-seq                                                                       | BioRxiv | Basic Science or Translational | 2019-10-31 |
| 449 | Patient stratification of clear cell renal cell carcinoma using the global transcription factor activity landscape derived from RNA-seq data                 | BioRxiv | Basic Science or Translational | 2019-11-04 |
| 450 | MicroRNA-148a Regulates Low-Density Lipoprotein Metabolism by Repressing the (Pro)renin Receptor                                                             | BioRxiv | Basic Science or Translational | 2019-11-05 |
| 451 | A Multimodal and Integrated Approach to Interrogate Human Kidney Biopsies with Rigor and Reproducibility: The Kidney Precision Medicine Project              | BioRxiv | Basic Science or Translational | 2019-11-06 |

|     |                                                                                                                                                                         |         |                                |            |
|-----|-------------------------------------------------------------------------------------------------------------------------------------------------------------------------|---------|--------------------------------|------------|
| 452 | High-Resolution 3D Fluorescent Imaging of Intact Tissues                                                                                                                | BioRxiv | Basic Science or Translational | 2019-11-06 |
| 453 | Human URAT1/SLC22A12 gene promoter is regulated by 27-hydroxycholesterol through estrogen response elements                                                             | BioRxiv | Basic Science or Translational | 2019-11-06 |
| 454 | Pseudohyphal growth of the emerging pathogen <i>Candida auris</i> is triggered by genotoxic stress through the S phase checkpoint                                       | BioRxiv | Basic Science or Translational | 2019-11-06 |
| 455 | Systematic Pan-Cancer Analysis Reveals the Functional Roles of Ferroptosis Across Cancers                                                                               | BioRxiv | Basic Science or Translational | 2019-11-06 |
| 456 | Differential binding cell-SELEX method to identify cell-specific aptamers using high-throughput sequencing                                                              | BioRxiv | Basic Science or Translational | 2019-11-07 |
| 457 | MicroRNA 1253 regulation of WAVE2 and its relevance to health disparities in hypertension                                                                               | BioRxiv | Basic Science or Translational | 2019-11-07 |
| 458 | PKMYT1 is a computationally predicted target for kidney cancer                                                                                                          | BioRxiv | Basic Science or Translational | 2019-11-08 |
| 459 | Exploring the role of the metabolite-sensing receptor GPR109a in diabetic nephropathy                                                                                   | BioRxiv | Basic Science or Translational | 2019-11-11 |
| 460 | A deregulated stress response underlies distinct INF2 associated disease profiles                                                                                       | BioRxiv | Basic Science or Translational | 2019-11-12 |
| 461 | Caramel Dye IV Induces Oxidative Stress Damage In Liver And Kidney From Mice                                                                                            | BioRxiv | Basic Science or Translational | 2019-11-12 |
| 462 | Classification of clear cell renal cell carcinoma based on PKM alternative splicing                                                                                     | BioRxiv | Basic Science or Translational | 2019-11-12 |
| 463 | SOX9 is required for kidney fibrosis and regulates NAV3 to control renal myofibroblast function in mice and humans                                                      | BioRxiv | Basic Science or Translational | 2019-11-12 |
| 464 | The early local and systemic Type I interferon responses to ultraviolet B light exposure are cGAS dependent                                                             | BioRxiv | Basic Science or Translational | 2019-11-14 |
| 465 | Proteolytic Cleavage by Matriptase Exacerbating Kidney Injury: a Novel Therapeutic Target                                                                               | BioRxiv | Basic Science or Translational | 2019-11-15 |
| 466 | A precision medicine approach uncovers a unique signature of neutrophils in patients with brushite kidney stones                                                        | BioRxiv | Basic Science or Translational | 2019-11-16 |
| 467 | Evaluation of Dose Fractionated Polymyxin B on Acute Kidney Injury: A Translational In Vivo Model                                                                       | BioRxiv | Basic Science or Translational | 2019-11-18 |
| 468 | The proteome of small urinary extracellular vesicles after kidney transplantation as an indicator of renal cellular biology and a source for markers predicting outcome | BioRxiv | Basic Science or Translational | 2019-11-18 |
| 469 | Semaphorin 3A induces cytoskeletal paralysis in tumor-specific CD8+ T cells                                                                                             | BioRxiv | Basic Science or Translational | 2019-11-20 |
| 470 | Ctcf Haploinsufficiency Mediates Intron Retention in A Tissue-specific Manner                                                                                           | BioRxiv | Basic Science or Translational | 2019-11-22 |
| 471 | The Landscape of Mutations in Fumarate Hydratase                                                                                                                        | BioRxiv | Basic Science or Translational | 2019-11-23 |
| 472 | Identification of miRNA signatures for kidney renal clear cell carcinoma using the tensor-decomposition method                                                          | BioRxiv | Basic Science or Translational | 2019-11-25 |
| 473 | Paracrine and autocrine R-spondin signalling is essential for the maintenance and differentiation of renal stem cells                                                   | BioRxiv | Basic Science or Translational | 2019-11-29 |
| 474 | The Structural Basis for Glycerol Permeation by human AQP7                                                                                                              | BioRxiv | Basic Science or Translational | 2019-11-29 |
| 475 | IRSp53 shapes the plasma membrane and controls polarized transport at the nascent lumen during epithelial morphogenesis                                                 | BioRxiv | Basic Science or Translational | 2019-12-03 |
| 476 | Single-cell transcriptomics reveals diverse and complex gene expression alterations in human trisomy 18                                                                 | BioRxiv | Basic Science or Translational | 2019-12-03 |
| 477 | scOpen: chromatin-accessibility estimation of single-cell ATAC data                                                                                                     | BioRxiv | Basic Science or Translational | 2019-12-05 |
| 478 | The ER cargo receptor SURF4 facilitates efficient erythropoietin secretion                                                                                              | BioRxiv | Basic Science or Translational | 2019-12-06 |

|     |                                                                                                                                                           |         |                                |            |
|-----|-----------------------------------------------------------------------------------------------------------------------------------------------------------|---------|--------------------------------|------------|
| 479 | CUB domain-containing protein 1 controls HGF responses by integrating Src and Met–STAT3 signaling                                                         | BioRxiv | Basic Science or Translational | 2019-12-07 |
| 480 | A revised mechanism of action of hyperaldosteronism-linked mutations in cytosolic domains of GIRK4 (KCNJ5)                                                | BioRxiv | Basic Science or Translational | 2019-12-09 |
| 481 | Recombinant human soluble thrombomodulin is associated with attenuation of sepsis-induced renal impairment by inhibition of extracellular histone release | BioRxiv | Basic Science or Translational | 2019-12-09 |
| 482 | Dietary restriction transforms the protein sulfhydrylome in a tissue-specific and cystathionine $\gamma$ -lyase-dependent manner                          | BioRxiv | Basic Science or Translational | 2019-12-10 |
| 483 | M-current downregulation leads to stellate ganglia sympathetic hyperactivity associated with hypertension                                                 | BioRxiv | Basic Science or Translational | 2019-12-11 |
| 484 | Tubular STAT3 limits renal inflammation in autosomal dominant polycystic kidney disease                                                                   | BioRxiv | Basic Science or Translational | 2019-12-12 |
| 485 | Genome-wide assessment of genetic risk for systemic lupus erythematosus and disease severity                                                              | BioRxiv | Basic Science or Translational | 2019-12-13 |
| 486 | Staphylococcal Enterotoxin C promotes Staphylococcus aureus Infective Endocarditis Independent of Superantigen Activity                                   | BioRxiv | Basic Science or Translational | 2019-12-13 |
| 487 | Novel Variants in COL4A3 and COL4A4 are Causes of Alport Syndrome in Rio Grande do Norte, Brazil                                                          | BioRxiv | Basic Science or Translational | 2019-12-17 |
| 488 | Murine models of renal ischaemia reperfusion injury: An opportunity for refinement using non-invasive monitoring methods                                  | BioRxiv | Basic Science or Translational | 2019-12-19 |
| 489 | PAMOGK: A Pathway Graph Kernel based Multi-Omics Clustering Approach for Discovering Cancer Patient Subgroups                                             | BioRxiv | Basic Science or Translational | 2019-12-19 |
| 490 | Precision Sub-phenotyping of Histologically Stable Kidney Transplants by a Composite Molecular and Cellular Instability Score                             | BioRxiv | Basic Science or Translational | 2019-12-19 |
| 491 | mTOR Haploinsufficiency Ameliorates Renal Cyst Formation in Adult Zebrafish tmem67 Mutants                                                                | BioRxiv | Basic Science or Translational | 2019-12-20 |
| 492 | Integrative analysis of the plasma proteome and polygenic risk of cardiometabolic diseases                                                                | BioRxiv | Basic Science or Translational | 2019-12-23 |
| 493 | Modeling acute kidney injury in kidney organoids with cisplatin                                                                                           | BioRxiv | Basic Science or Translational | 2019-12-23 |
| 494 | MRI tracking reveals selective accumulation of stem cell-derived magneto-extracellular vesicles in sites of injury                                        | BioRxiv | Basic Science or Translational | 2019-12-23 |
| 495 | On-demand spatiotemporal programming of collective cell migration via bioelectric stimulation                                                             | BioRxiv | Basic Science or Translational | 2019-12-23 |
| 496 | The Two Amino Acids Proximate to the Renin Cleavage Site of Human Angiotensinogen Do Not Affect Angiotensin II-mediated Functions in Mice                 | BioRxiv | Basic Science or Translational | 2019-12-26 |
| 497 | The genomic and epigenomic evolutionary history of papillary renal cell carcinomas                                                                        | BioRxiv | Basic Science or Translational | 2019-12-27 |
| 498 | Single Cell Profiling of Acute Kidney Injury Reveals Novel Transcriptional Signatures, Mixed Identities and Epithelial-to-Stromal Crosstalk               | BioRxiv | Basic Science or Translational | 2019-12-30 |
| 499 | Systematic assessment of tissue dissociation and storage biases in single-cell and single-nucleus RNA-seq workflows                                       | BioRxiv | Basic Science or Translational | 2019-12-30 |
| 500 | A translational kidney organoid system bolsters human relevance of clinical development candidate                                                         | BioRxiv | Basic Science or Translational | 2019-12-31 |
| 501 | Material-Driven Fibronectin Assembly Rescues Matrix Defects due to Mutations in Collagen IV in Fibroblasts                                                | BioRxiv | Basic Science or Translational | 2020-01-06 |
| 502 | Transfer of hepatocellular microRNA regulates cytochrome P450 2E1 in renal tubular cells                                                                  | BioRxiv | Basic Science or Translational | 2020-01-06 |
| 503 | Nephrotic Syndrome-Associated Hypercoagulopathy is Alleviated by Nuclear Receptor Agonist Therapy with both Pioglitazone and Glucocorticoids              | BioRxiv | Basic Science or Translational | 2020-01-07 |
| 504 | Genomic signature of accelerated evolution in a saline-alkaline lake-dwelling Schizothoracine fish                                                        | BioRxiv | Basic Science or Translational | 2020-01-08 |
| 505 | A prospective randomized trial examining health care utilization in individuals using multiple smartphone-enabled biosensors                              | BioRxiv | Clinical                       | 2016-01-14 |
| 506 | MDMA impairs response to water intake in healthy volunteers                                                                                               | BioRxiv | Clinical                       | 2016-04-17 |

|     |                                                                                                                                                                               |         |          |            |
|-----|-------------------------------------------------------------------------------------------------------------------------------------------------------------------------------|---------|----------|------------|
| 507 | PODOCYTURIA mRNAs: EARLIER AND SUPERIOR PREDICTORS OF CARDIOVASCULAR OUTCOMES                                                                                                 | BioRxiv | Clinical | 2016-04-23 |
| 508 | The elephant in the room- Universal coverage for Costly treatments in an upper middle income country                                                                          | BioRxiv | Clinical | 2017-01-09 |
| 509 | Utilization of network graph connectivity to evaluate complications of inpatient medical and surgical populations as a method to prioritize quality improvement efforts       | BioRxiv | Clinical | 2017-06-29 |
| 510 | Risk factor profile of different clinical manifestations of cerebral small vessel disease - data from SHEF-CSVD Study                                                         | BioRxiv | Clinical | 2017-08-12 |
| 511 | No evidence for association with APOL1 kidney disease risk alleles and Human African Trypanosomiasis in two Ugandan populations                                               | BioRxiv | Clinical | 2017-08-25 |
| 512 | Clustering of adult-onset diabetes into novel subgroups guides therapy and improves prediction of outcome                                                                     | BioRxiv | Clinical | 2017-09-08 |
| 513 | Differential Impacts of Dietary Modification on Individual Metabolic Phenotypes and their Relationship to Blood Pressure: Evidence of Latent Dietary Responder Sub-phenotypes | BioRxiv | Clinical | 2017-09-25 |
| 514 | Non-invasive detection of bladder cancer through the analysis of driver gene mutations and aneuploidy                                                                         | BioRxiv | Clinical | 2017-10-16 |
| 515 | Creating ethnicity-specific reference intervals for lab tests from EHR data                                                                                                   | BioRxiv | Clinical | 2017-11-04 |
| 516 | The plasma biomarker soluble SIGLEC-1 is associated with the type I interferon transcriptional signature, ethnic background and renal disease in systemic lupus erythematosus | BioRxiv | Clinical | 2017-11-09 |
| 517 | The Impact of 2017 ACC/AHA Guidelines on the Prevalence of Hypertension and Eligibility for Anti-Hypertensive Therapy in the United States and China                          | BioRxiv | Clinical | 2017-11-13 |
| 518 | Prediction of Acute Kidney Injury with a Machine Learning Algorithm using Electronic Health Record Data                                                                       | BioRxiv | Clinical | 2017-11-22 |
| 519 | Exploring repositioning opportunities and side-effects of statins: a Mendelian randomization study of HMG-CoA reductase inhibition with 55 complex traits                     | BioRxiv | Clinical | 2017-12-23 |
| 520 | Vascular risk factors for male and female urgency urinary incontinence at age 68 from a British birth cohort study                                                            | BioRxiv | Clinical | 2018-01-15 |
| 521 | Risk factors associated with Parkinson's disease: An 11-year population-based South Korean study                                                                              | BioRxiv | Clinical | 2018-01-26 |
| 522 | Epidemic foci of hemorrhagic fever with renal syndrome in Shandong Province, China, based on patients, rodents and molecular epidemiology characteristics, 2012-2015          | BioRxiv | Clinical | 2018-02-19 |
| 523 | The landscape of incident disease risk for the biomarker GlycA and its mortality stratification in angiography patients                                                       | BioRxiv | Clinical | 2018-03-13 |
| 524 | Hypertension and diabetes mellitus association to oxidative stress in an elderly population                                                                                   | BioRxiv | Clinical | 2018-03-16 |
| 525 | Surveillance of CKD epidemiology in the US – a joint analysis of NHANES and KEEP                                                                                              | BioRxiv | Clinical | 2018-03-31 |
| 526 | Progression of chronic kidney disease in African Americans with type 2 diabetes mellitus using topology learning in electronic medical records                                | BioRxiv | Clinical | 2018-04-04 |
| 527 | Deep Learning Global Glomerulosclerosis in Transplant Kidney Frozen Sections                                                                                                  | BioRxiv | Clinical | 2018-04-06 |
| 528 | Computational assessment of blood flow heterogeneity in dialysis patients' cardiac ventricles                                                                                 | BioRxiv | Clinical | 2018-04-14 |
| 529 | Molecular genetic analysis of Steroid Resistant Nephrotic Syndrome: Detection of a novel mutation                                                                             | BioRxiv | Clinical | 2018-04-22 |
| 530 | Reverse Engineered Virtual Patient Populations as Surrogates for Real Patient-Level Data                                                                                      | BioRxiv | Clinical | 2018-04-25 |
| 531 | Outbreak of Glomerulonephritis by Streptococcus zooepidemicus SzPHV5 type, in Monte Santo de Minas, Minas Gerais, Brazil                                                      | BioRxiv | Clinical | 2018-05-25 |
| 532 | A machine learning method for subgroup analysis of randomized controlled trials                                                                                               | BioRxiv | Clinical | 2018-06-04 |
| 533 | Headache and type 2 diabetes association: a US national ambulatory case-control study                                                                                         | BioRxiv | Clinical | 2018-06-04 |

|     |                                                                                                                                                                              |         |          |            |
|-----|------------------------------------------------------------------------------------------------------------------------------------------------------------------------------|---------|----------|------------|
| 534 | Association of the GIPR Glu354Gln (rs1800437) polymorphism with hypertension in a Brazilian population                                                                       | BioRxiv | Clinical | 2018-06-06 |
| 535 | Seroprevalence of fourteen human polyomaviruses determined in blood donors                                                                                                   | BioRxiv | Clinical | 2018-06-28 |
| 536 | Strong and specific associations between cardiovascular risk factors and brain white matter micro- and macro-structure in health ageing                                      | BioRxiv | Clinical | 2018-07-05 |
| 537 | Medical Nonadherence, Cannabis Use, and Renal Outcome in Systemic Lupus Erythematosus                                                                                        | BioRxiv | Clinical | 2018-08-15 |
| 538 | High altitude adaptation mitigates anemia risk associated with diabetes among the Mosuo of Southwest China                                                                   | BioRxiv | Clinical | 2018-09-03 |
| 539 | Association of Peripheral Blood Pressure with Grey Matter Volume in 19- to 40-Year-Old Adults                                                                                | BioRxiv | Clinical | 2018-09-10 |
| 540 | Redefining Nephrotic Syndrome in Molecular Terms: Outcome-associated molecular clusters and patient stratification with noninvasive surrogate biomarkers                     | BioRxiv | Clinical | 2018-09-27 |
| 541 | Unsupervised integration of multimodal dataset identifies novel signatures of health and disease                                                                             | BioRxiv | Clinical | 2018-10-03 |
| 542 | A novel approach reveals that HLA class 1 single antigen bead-signatures provide a means of high-accuracy pre-transplant risk assessment of acute cellular rejection         | BioRxiv | Clinical | 2018-10-05 |
| 543 | A novel signature derived from immunoregulatory and hypoxia genes predicts prognosis in liver and five other cancers                                                         | BioRxiv | Clinical | 2018-10-14 |
| 544 | Maternal and fetal genetic effects on birth weight and their relevance to cardio-metabolic risk factors                                                                      | BioRxiv | Clinical | 2018-10-17 |
| 545 | Unsupervised Machine learning to subtype Sepsis-Associated Acute Kidney Injury                                                                                               | BioRxiv | Clinical | 2018-10-18 |
| 546 | Reporting of "dialysis adequacy" as an outcome in randomised trials conducted in adults on haemodialysis: a systematic review                                                | BioRxiv | Clinical | 2018-10-25 |
| 547 | A Pre-transplant Blood-based Lipid Signature for Prediction of Antibody-mediated Rejection in Kidney Transplant Patients                                                     | BioRxiv | Clinical | 2018-11-01 |
| 548 | Comparison of Approaches to the identification of Symptom Burden in Hemodialysis Patients Utilizing Electronic Health Records                                                | BioRxiv | Clinical | 2018-11-02 |
| 549 | A silent killer in the Far North Region of Cameroon: increasing prevalence of hypertension among population living in Kaele                                                  | BioRxiv | Clinical | 2018-11-16 |
| 550 | Non-Communicable Diseases and their determinants: A Cross-sectional State-Wide STEPS Survey, Haryana, North India                                                            | BioRxiv | Clinical | 2018-11-28 |
| 551 | Relationship between Parathyroid Hormone Levels and Hazards of Fracture, Vascular Events and Death in Stage 3 and 4 Chronic Kidney Disease                                   | BioRxiv | Clinical | 2018-11-28 |
| 552 | Urinary AQP5 is independently associated with eGFR decline in patients with type 2 diabetes and nephropathy                                                                  | BioRxiv | Clinical | 2018-12-04 |
| 553 | Long-Term Effects of a Novel Continuous Remote Care Intervention Including Nutritional Ketosis for the Management of Type 2 Diabetes: A 2-year Non-randomized Clinical Trial | BioRxiv | Clinical | 2018-12-06 |
| 554 | Histological evidences of diabetic kidney disease precede clinical diagnosis Serum GlycA level is a candidate biomarker for disease activity in systemic                     | BioRxiv | Clinical | 2018-12-11 |
| 555 | lupus erythematosus and for proliferative status of lupus nephritis, independent of renal function impairment                                                                | BioRxiv | Clinical | 2018-12-12 |
| 556 | Urinary biomarkers and cardiovascular outcomes in the UK Biobank: observational and Mendelian randomization analyses                                                         | BioRxiv | Clinical | 2018-12-21 |
| 557 | A novel nonsense mutation c.424G>T (p. G142X) in the first exon of XLAs leading to osteopetrosis                                                                             | BioRxiv | Clinical | 2018-12-27 |
| 558 | Prohibitin is a prognostic marker of relapse and therapeutic target to block chemotherapy resistance in Wilms tumor                                                          | BioRxiv | Clinical | 2018-12-30 |
| 559 | Associations between vascular risk factors and brain MRI indices in UK Biobank                                                                                               | BioRxiv | Clinical | 2019-01-03 |
| 560 | Patterns of Treatment in Patients with Heart Failure with Preserved Ejection Fraction: the REasons for Geographic And Racial Differences in Stroke study                     | BioRxiv | Clinical | 2019-01-04 |

|     |                                                                                                                                                                               |         |          |            |
|-----|-------------------------------------------------------------------------------------------------------------------------------------------------------------------------------|---------|----------|------------|
| 561 | Efficacy and Safety of Immunosuppressive Treatment in IgA Nephropathy: A Meta-analysis of Randomized Controlled Trials                                                        | BioRxiv | Clinical | 2019-01-08 |
| 562 | Sarcopenia is an independent predictor of hospitalization in chronic kidney disease outpatients                                                                               | BioRxiv | Clinical | 2019-01-09 |
| 563 | Comparison of antihypertensive drug classes for dementia prevention                                                                                                           | BioRxiv | Clinical | 2019-01-12 |
| 564 | Prevention of heart failure in hypertension – disentangling the role of evolving left ventricular hypertrophy and blood pressure lowering: the ALLHAT study                   | BioRxiv | Clinical | 2019-01-12 |
| 565 | Healthcare related activity following kidney transplantation: an observational cohort study                                                                                   | BioRxiv | Clinical | 2019-01-18 |
| 566 | Validity and internal consistency of EQ-5D-3L quality of life tool among pre-dialysis patients with chronic kidney disease in Sri Lanka, a lower middle-income country        | BioRxiv | Clinical | 2019-01-20 |
| 567 | EVALUATION OF FEMALE SEXUAL FUNCTION IN PERSONS WITH TYPE 2 DIABETES MELLITUS SEEN IN A TERTIARY HOSPITAL IN SOUTH EAST NIGERIA WITH EMPHASIS ON ITS FREQUENCY AND PREDICTORS | BioRxiv | Clinical | 2019-01-21 |
| 568 | A cross-sectional study to assess the magnitude of Hypertension and Type 2 Diabetes Mellitus in Hatcliffe, Harare                                                             | BioRxiv | Clinical | 2019-01-30 |
| 569 | Assessment of the cardiovascular adverse effects of drug-drug interactions through a combined analysis of spontaneous reports and predicted drug-target interactions          | BioRxiv | Clinical | 2019-02-07 |
| 570 | Improving Proteinuria Screening with Mailed Smartphone Urinalysis Testing in Previously Unscreened Patients with Hypertension: a Randomized Controlled Trial                  | BioRxiv | Clinical | 2019-02-08 |
| 571 | Disease spectrum and outcomes among elderly patients in two tertiary hospitals in Dar es Salaam, Tanzania                                                                     | BioRxiv | Clinical | 2019-02-19 |
| 572 | Pool walking may temporarily improve renal function by suppressing renin-angiotensin-aldosterone system in pregnant women                                                     | BioRxiv | Clinical | 2019-02-22 |
| 573 | Undiagnosed and diagnosed hypertension in a community setting at Hosanna town: Uncovering the burden                                                                          | BioRxiv | Clinical | 2019-02-26 |
| 574 | Clinical significance of C4d deposition in renal tissues from patients with primary Sjögren’s syndrome—A preliminary study                                                    | BioRxiv | Clinical | 2019-02-27 |
| 575 | Postpartum trend in blood pressure and renal function in women with severe preeclampsia and eclampsia: A prospective cohort-study at Mulago hospital, Kampala, Uganda         | BioRxiv | Clinical | 2019-02-27 |
| 576 | Segmentation of Glomeruli Within Trichrome Images Using Deep Learning                                                                                                         | BioRxiv | Clinical | 2019-02-28 |
| 577 | A common tag nucleotide variant in MMP7 promoter increases risk for hypertension via enhanced interactions with CREB transcription factor                                     | BioRxiv | Clinical | 2019-03-06 |
| 578 | Primary care use of laboratory tests in Northern Ireland’s Western Health and Social Care Trust: a cross-sectional study                                                      | BioRxiv | Clinical | 2019-03-12 |
| 579 | Self-reported sleep duration and daytime napping are associated with renal hyperfiltration and microalbuminuria in apparently healthy Chinese population                      | BioRxiv | Clinical | 2019-03-21 |
| 580 | Dietary acculturation of Asian and the Middle East and North African region immigrants to Saudi Arabia: healthy or unhealthy acquired nutritional behavior?                   | BioRxiv | Clinical | 2019-03-28 |
| 581 | Prediction of rapid kidney function decline using machine learning combining blood biomarkers and electronic health record data                                               | BioRxiv | Clinical | 2019-03-28 |
| 582 | Knowledge, attitudes and practices of hypertension in a community based cross sectional study done in Ward 14, Gwanda District, Matebeleland South, Zimbabwe                  | BioRxiv | Clinical | 2019-04-04 |
| 583 | Machine learning predicts early-onset acute organ failure in critically ill patients with sickle cell disease                                                                 | BioRxiv | Clinical | 2019-04-07 |
| 584 | Clinical evaluation of presepsin considering renal function                                                                                                                   | BioRxiv | Clinical | 2019-04-10 |
| 585 | Association between body mass index (BMI) and hypertension in South Asian population: Evidence from Demographic and Health Survey                                             | BioRxiv | Clinical | 2019-04-12 |

|     |                                                                                                                                                                                                                                                |         |          |            |
|-----|------------------------------------------------------------------------------------------------------------------------------------------------------------------------------------------------------------------------------------------------|---------|----------|------------|
| 586 | The Dialysis Procedure Triggers Autonomic Imbalance and Cardiac Arrhythmias: Insights from Continuous 14-day ECG Monitoring                                                                                                                    | BioRxiv | Clinical | 2019-04-12 |
| 587 | Thick perirenal fat predicts the growth pattern of renal cell carcinoma                                                                                                                                                                        | BioRxiv | Clinical | 2019-04-12 |
| 588 | Determination of clinical risk factors associated with inflammation in hypertensive patients with type-2 diabetes mellitus                                                                                                                     | BioRxiv | Clinical | 2019-04-18 |
| 589 | Use of latent class analysis to identify multimorbidity patterns and associated factors in Korean adults aged 50 years and older                                                                                                               | BioRxiv | Clinical | 2019-04-18 |
| 590 | Association and impact of hypertension defined using the 2017 AHA/ACC guidelines on the risk of atrial fibrillation in the Atherosclerosis Risk in Communities Study                                                                           | BioRxiv | Clinical | 2019-04-26 |
| 591 | Renal and Renal Sinus Fat Volumes as Quantified by Magnetic Resonance Imaging in Subjects with Prediabetes, Diabetes, and Normal Glucose Tolerance.                                                                                            | BioRxiv | Clinical | 2019-04-30 |
| 592 | Prevalence, awareness and control of hypertension in Malaysia 1980 – 2017: A Systematic Review and Meta-Analysis                                                                                                                               | BioRxiv | Clinical | 2019-05-01 |
| 593 | Renal Localization of Plasmodium vivax and Zoonotic Monkey Parasite Plasmodium knowlesi Derived Components in Malaria Associated Acute Kidney Injury                                                                                           | BioRxiv | Clinical | 2019-05-03 |
| 594 | Association of simple renal cysts and chronic kidney disease with large abdominal aortic aneurysm                                                                                                                                              | BioRxiv | Clinical | 2019-05-07 |
| 595 | Immunosuppressive regimens based on Cyclophosphamide or Calcineurin inhibitors: Comparison of their effect in the long term outcome of Primary Membranous Nephropathy                                                                          | BioRxiv | Clinical | 2019-05-08 |
| 596 | The Role of the Public Health Service Equalization Program in the Control of Hypertension in China: Results from a Cross-sectional Health Interview Survey                                                                                     | BioRxiv | Clinical | 2019-05-08 |
| 597 | Increasing objective cardiometabolic burden associated with attenuations in the P3b event-related potential component in older adults                                                                                                          | BioRxiv | Clinical | 2019-05-12 |
| 598 | Alcohol consumption, obesity and hypertension: Relationship patterns along different age groups in Uganda                                                                                                                                      | BioRxiv | Clinical | 2019-05-29 |
| 599 | A slight decrease in serum albumin level is associated with rapid progression of kidney dysfunction even within the normal range: The Yuport Health Checkup Center Cohort Study                                                                | BioRxiv | Clinical | 2019-05-30 |
| 600 | Studies on Biochemical Changes and Prolactin Level Evaluation in Patients with Chronic Kidney Disease                                                                                                                                          | BioRxiv | Clinical | 2019-06-01 |
| 601 | 3D-printed moulds of renal tumours for image-guided tissue sampling in the clinical setting                                                                                                                                                    | BioRxiv | Clinical | 2019-06-03 |
| 602 | Cost utility analysis of end stage renal disease treatment in Ministry of Health dialysis centres, Malaysia: hemodialysis versus continuous ambulatory peritoneal dialysis                                                                     | BioRxiv | Clinical | 2019-06-04 |
| 603 | Health Conditions Associated with Overweight in Climacteric Women                                                                                                                                                                              | BioRxiv | Clinical | 2019-06-05 |
| 604 | Risk factors associated with loss of hepatitis B virus surface antibody in patients with HBV surface-antigen negative/surface antibody positive serostatus receiving biologic DMARDs to treat rheumatic diseases – a nested case-control study | BioRxiv | Clinical | 2019-06-05 |
| 605 | Automated Clear Cell Renal Carcinoma Grade Classification with Prognostic Significance                                                                                                                                                         | BioRxiv | Clinical | 2019-06-06 |
| 606 | Burden of tumor mutations, neoepitopes, and other variants are cautionary predictors of cancer immunotherapy response and overall survival                                                                                                     | BioRxiv | Clinical | 2019-06-08 |
| 607 | Socioeconomic Differentials in Hypertension based on JNC7 and ACC/AHA 2017 Guidelines Mediated by Body Mass Index: Evidence from Nepal Demographic and Health Survey                                                                           | BioRxiv | Clinical | 2019-06-11 |
| 608 | Socio-demographic correlates and clustering of non-communicable diseases risk factors among reproductive aged women of Nepal: Results from Nepal Demographic Health Survey 2016                                                                | BioRxiv | Clinical | 2019-06-12 |
| 609 | Nationwide prediction of type 2 diabetes comorbidities                                                                                                                                                                                         | BioRxiv | Clinical | 2019-06-14 |
| 610 | Rituximab treatment for IgA vasculitis: A systematic review                                                                                                                                                                                    | BioRxiv | Clinical | 2019-06-19 |

|     |                                                                                                                                                                                                                                         |         |          |            |
|-----|-----------------------------------------------------------------------------------------------------------------------------------------------------------------------------------------------------------------------------------------|---------|----------|------------|
| 611 | A Comparison of Comorbidities and their Contribution to Medical Resource Utilization for Matched HIV-Infected and Uninfected Individuals: A Cross-Sectional Analysis                                                                    | BioRxiv | Clinical | 2019-06-20 |
| 612 | Development of equations for converting random-zero to automated oscillometric blood pressure values                                                                                                                                    | BioRxiv | Clinical | 2019-07-01 |
| 613 | Long term outcomes of Everolimus therapy in de novo liver transplantation: a systematic review and meta-analysis of randomized controlled trials                                                                                        | BioRxiv | Clinical | 2019-07-15 |
| 614 | Prevalence and Risk Factors Associated to Non-Communicable Diseases in Khartoum State                                                                                                                                                   | BioRxiv | Clinical | 2019-07-22 |
| 615 | Sex-associated differences in cytomegalovirus prevention: Prophylactic strategy is associated with a strong kidney function impairment in female renal transplant patients                                                              | BioRxiv | Clinical | 2019-08-06 |
| 616 | Relationship between birth weight and chronic kidney disease: an integrative analysis of observational studies and causal inference through genetic approaches                                                                          | BioRxiv | Clinical | 2019-08-08 |
| 617 | Interactions of pharmaceutical companies with world countries, cancers and rare diseases from Wikipedia network analysis                                                                                                                | BioRxiv | Clinical | 2019-08-26 |
| 618 | Electrophysiological evidence for impaired auditory sensory memory in Cystinosis despite typical sensory processing: An MMN investigation                                                                                               | BioRxiv | Clinical | 2019-08-28 |
| 619 | Meta-analysis and Commentary: Preemptive Correction of Arteriovenous Access Stenosis                                                                                                                                                    | BioRxiv | Clinical | 2019-08-28 |
| 620 | Prognostic value of Red Blood Cell Distribution Width in Acute Kidney Injury Patients: A Systematic Review and Meta-analysis                                                                                                            | BioRxiv | Clinical | 2019-08-28 |
| 621 | Multilevel modelling, prevalence and predictors of hypertension in Ghana: Evidence from Wave 2 of the World Health Organization's Study on Global AGEing and adult health                                                               | BioRxiv | Clinical | 2019-08-29 |
| 622 | An evaluation of Nephrology Literature for Transparency and Reproducibility Indicators: Cross-sectional Review                                                                                                                          | BioRxiv | Clinical | 2019-09-09 |
| 623 | Causal inference for the effect of environmental chemicals on chronic kidney disease                                                                                                                                                    | BioRxiv | Clinical | 2019-09-14 |
| 624 | Blood pressure variability from intra-arterial recordings in humans                                                                                                                                                                     | BioRxiv | Clinical | 2019-09-25 |
| 625 | Harnessing Digital Health to Objectively Assess Cognitive Impairment in People undergoing Hemodialysis Process: The Impact of Cognitive Impairment on Mobility Performance Measured by Wearables                                        | BioRxiv | Clinical | 2019-11-05 |
| 626 | A pilot study of behavioral, environmental, and occupational risk factors for chronic kidney disease of unknown etiology in Sri Lanka                                                                                                   | BioRxiv | Clinical | 2019-11-10 |
| 627 | Kidney Function and Blood Pressure: A Bi-directional Mendelian Randomisation Study                                                                                                                                                      | BioRxiv | Clinical | 2019-11-29 |
| 628 | Causal relationships between obesity and the leading causes of death in women and men                                                                                                                                                   | BioRxiv | Clinical | 2020-01-06 |
| 629 | A Combined HLA Molecular Mismatch and Expression Analysis for Evaluating HLA-DPB1 de novo Donor-Specific Antibody Risk in Pediatric Solid Organ Transplantation: Implications for Solid Organ & Hematopoietic Stem Cell Transplantation | MedRxiv | Clinical | 2020-01-10 |
| 630 | A Personalized Multi-Component Lifestyle Intervention Program Leads to Improved Quality of Life in Persons with Chronic Kidney Disease                                                                                                  | MedRxiv | Clinical | 2019-10-02 |
| 631 | Association between the ACE I/D gene polymorphism and progressive renal failure in autosomal dominant polycystic kidney disease: A meta-analysis                                                                                        | MedRxiv | Clinical | 2019-08-09 |
| 632 | Automated Localization and Segmentation of Mononuclear Cell Aggregates in Kidney Histological Images Using Deep Learning                                                                                                                | MedRxiv | Clinical | 2019-07-20 |
| 633 | Blood pressure and cognitive function across the eighth decade: a prospective study of the Lothian Birth Cohort of 1936                                                                                                                 | MedRxiv | Clinical | 2019-12-19 |
| 634 | Classification of glomerular pathological findings using deep learning and nephrologist-AI collective intelligence approach                                                                                                             | MedRxiv | Clinical | 2020-01-02 |
| 635 | Cohort profile: The International epidemiology Databases to Evaluate AIDS (IeDEA) in sub-Saharan Africa, 2012-2019                                                                                                                      | MedRxiv | Clinical | 2019-10-29 |



|     |                                                                                                                                                                                                              |         |          |            |
|-----|--------------------------------------------------------------------------------------------------------------------------------------------------------------------------------------------------------------|---------|----------|------------|
| 636 | Cost of hypertension illness and associated factors among patients attending hospitals in Southwest Shewa Zone, Oromia Regional State, Ethiopia.                                                             | MedRxiv | Clinical | 2019-12-21 |
| 637 | Current characteristics and outcomes of Cytomegalovirus Reactivation in kidney transplant seropositive recipients in the era of prophylaxis treatment. Lesson from single Moroccan center experience.        | MedRxiv | Clinical | 2019-06-28 |
| 638 | Discovery of 318 novel loci for type-2 diabetes and related micro- and macrovascular outcomes among 1.4 million participants in a multi-ethnic meta-analysis.                                                | MedRxiv | Clinical | 2019-11-25 |
| 639 | Disease overarching mechanisms that explain and predict outcome of patients with high cardiovascular risk: rationale and design of the Berlin Long-term Observation of Vascular Events (BeLOVE) study        | MedRxiv | Clinical | 2019-07-15 |
| 640 | Disease overarching mechanisms that explain and predict outcome of patients with high cardiovascular risk: rationale and design of the Berlin Long-term Observation of Vascular Events (BeLOVE) study        | MedRxiv | Clinical | 2019-07-15 |
| 641 | DRUG-INDUCED DECREASED URINE OUTPUT PREDICTS PDA CLOSURE IN PRETERM NEONATES                                                                                                                                 | MedRxiv | Clinical | 2019-12-19 |
| 642 | DyeVer PLUS EZ system for Preventing Contrast-Induced Acute Kidney Injury in Patients Undergoing Diagnostic Coronary Angiography and/or Percutaneous Coronary Intervention: A UK-Based Cost-Utility Analysis | MedRxiv | Clinical | 2019-10-08 |
| 643 | Elevated blood pressure in the emergency department - a risk factor for incident cardiovascular disease: An EHR-based cohort study                                                                           | MedRxiv | Clinical | 2019-08-10 |
| 644 | Estimation of Quasi-Continuous Blood Pressure based on Harmonic Phase-Shifts in Signals using Non-Invasive Photoplethysmographic Measurements                                                                | MedRxiv | Clinical | 2019-12-21 |
| 645 | Evaluation of the causal effects of blood lipid levels on gout with summary level GWAS data: two-sample Mendelian randomization and mediation analysis                                                       | MedRxiv | Clinical | 2019-09-16 |
| 646 | Exploring barriers and facilitators to integrated hypertension-HIV management in Ugandan HIV clinics using the Consolidated Framework for Implementation Research (CFIR)                                     | MedRxiv | Clinical | 2019-12-09 |
| 647 | Generalisability of Results from UK Biobank: Comparison With a Pooling of 18 Cohort Studies                                                                                                                  | MedRxiv | Clinical | 2019-08-13 |
| 648 | Genetic analysis of functional rare germline variants across 9 cancer types from the DiscovEHR study                                                                                                         | MedRxiv | Clinical | 2019-12-12 |
| 649 | Genetically predicted serum urate, blood pressure and cardiovascular disease: an updated Mendelian randomization investigation                                                                               | MedRxiv | Clinical | 2019-12-15 |
| 650 | Immune-checkpoint engagement as predictive biomarkers in clear cell renal cell carcinoma and melanoma                                                                                                        | MedRxiv | Clinical | 2020-01-16 |
| 651 | Is therapeutic inertia present in primary diabetes care in Malaysia? A prospective study                                                                                                                     | MedRxiv | Clinical | 2019-11-25 |
| 652 | miRNA profiling in renal carcinoma suggest the existence of a group of pro-angiogenic tumors in localized clear cell renal carcinoma                                                                         | MedRxiv | Clinical | 2019-12-15 |
| 653 | Mortality, disease progression, and disease burden of acute kidney injury in alcohol use disorder subpopulation                                                                                              | MedRxiv | Clinical | 2020-01-16 |
| 654 | Novel delivery of cellular therapy to reduce ischaemia reperfusion injury in kidney transplantation                                                                                                          | MedRxiv | Clinical | 2019-09-08 |
| 655 | Plasminogenuria is associated with podocyte injury, edema, and kidney dysfunction in incident glomerular disease                                                                                             | MedRxiv | Clinical | 2019-09-16 |
| 656 | Polygenic risk scores predict diabetic complications and their response to therapy                                                                                                                           | MedRxiv | Clinical | 2019-11-02 |
| 657 | Predicting Residual Function in Hemodialysis and Hemodiafiltration : A Population Kinetic, Decision Analytic Approach                                                                                        | MedRxiv | Clinical | 2019-07-09 |
| 658 | Prevention of bone loss and fractures following solid organ transplantations: Protocol for a systematic review and network meta-analysis                                                                     | MedRxiv | Clinical | 2019-12-06 |
| 659 | Prognostic Imaging Biomarkers for Diabetic Kidney Disease (iBEAT): Study protocol                                                                                                                            | MedRxiv | Clinical | 2020-01-16 |

|     |                                                                                                                                                                   |         |          |            |
|-----|-------------------------------------------------------------------------------------------------------------------------------------------------------------------|---------|----------|------------|
| 660 | Rare Loss-of-Function Mutations of PTGIR identified in Fibromuscular Dysplasia and Spontaneous Coronary Artery Dissection                                         | MedRxiv | Clinical | 2019-11-27 |
| 661 | Rate of Force Development is Related to Maximal Force, Muscle Quality and Physical Function in Patients With Chronic Kidney Disease Predialysis                   | MedRxiv | Clinical | 2019-12-11 |
| 662 | Redefining the Bladder Cancer Phenotype using Patterns of Familial Risk                                                                                           | MedRxiv | Clinical | 2019-08-16 |
| 663 | Risk prediction with office and ambulatory blood pressure using artificial intelligence                                                                           | MedRxiv | Clinical | 2020-01-18 |
| 664 | Screening of Diabetes and Hypertension Based on Retinal Fundus Photographs Using Deep Learning                                                                    | MedRxiv | Clinical | 2019-12-24 |
| 665 | Socioeconomic inequalities in blood pressure: co-ordinated analysis of 147,775 participants from repeated birth cohort and cross-sectional datasets, 1989 to 2016 | MedRxiv | Clinical | 2019-12-21 |
| 666 | Temporal Relationship of Computed and Structured Diagnoses in Electronic Health Record Data                                                                       | MedRxiv | Clinical | 2020-01-02 |
| 667 | The relationship between antihypertensive medications and mood disorders: analysis of linked healthcare data for 1.8 million patients.                            | MedRxiv | Clinical | 2019-12-20 |
